# Supplementary material for: Repurposing drugs against the main protease of SARS-CoV-2: mechanism-based insights supported by available laboratory and clinical data
Source: Royal Society of Chemistry journal article supplement (doi:10.1039/d0mo00057d), 2020-06-26
Supplement: d0mo00057d3.xlsx [file d0mo00057d3.xlsx]

## Sheet: Table_of_Contents
Repurposing drugs against main protease of SARS-CoV-2: mechanism based insights supported by available laboratory and clinical data Sohini Chakraborti, Sneha Bheemireddy, Narayanaswamy Srinivasan* Molecular Biophysics Unit, Indian Institute of Science, Bengaluru 560012, India *Corresponding author E-mail: ns@iisc.ac.in
This excel workbook contains all the supplementary tables. The caption to the tables are mentioned below. The sheets with prefix 'INDEX' contains the explanations for the data tabulated in the different columns of the respective tables (wherever such an explanation is needed).
	Sl. No.	Table. No.	Caption to tables
	1	S1a	List of structural neighbours of Mpro obtained from DALI search
	2	S1b	Details of structural neighbours of Mpro obtained from DALI search
	3	S1c	List of local structural (binding site) neighbours of Mpro obtained from ProBis search
	4	S1d	Details of local structural (binding site) neighbours of Mpro obtained from ProBis
	5	S2a	Details of shortlisted drugs as obtained from workflow-I
	6	S2b	Docking analysis of selected molecules from workflow-I
	7	S3	Details of shortlisted drugs as obtained from workflow-II
	8	S4	Chemical similarity matrix of SARS-CoV-2 Mpro binders identified in our study with respect to selected set of potential anti-coronavirus molecules already reported
	9	S5	Combined list of all potential small molecule drugs obtained from workflow-I and workflow-II

## Sheet: INDEX_S1
The next four sheets contain the tables with prefix 'S1' Table S1a contains the list of structural neighbours of Mpro (PDB entries) obtained from DALI search and mapped to Uniprot ID. Table S1b contains detailed information on the structural neighbours of Mpro obtained from DALI search. The entry in blue font in Table S1a and S1b is a case of self-hit, i.e., SARS-CoV-2 Mpro structures. Table S1c …
Index to Table S1b
Cloumn	Description	Explanation
(A)	Sl.no.	Serial number
(B)	UniProt_ID	Self-explanatory; green : proteins for which at least one molecule could be found in DrugBank (details are available in Table S2a)
(C)	Protein name	Self-explanatory;
(D)	Organism	Self-explanatory; Red : Homo Sapiens (Human)
(E)	SCOPe Fold/ CATH Superfamily	Structural information on Fold/Superfamily of proteins obtained from SCOPe/ CATH databases
(F)	Dali_Z-Score	Z-score values across different protein strutcures with identical Uniprot ID obtained as hits during the search for structural neighbours; If one Uniprot ID has multiple hits, best Z-Score is reported.
NA : The PDB entry is not available in SCOPe as well as CATH; NN: The PDB entry is not available in SCOPe but is listed in CATH. However, no name has been assigned to its class yet.
Index to Table S1d
Cloumn	Description	Explanation
(A)	Sl.no.	Serial number
(B)	UniProt_ID	Self-explanatory; green: proteins which have been picked up in DALI search
(C)	Protein name	Self-explanatory;
(D)	Organism	Self-explanatory; Red : Homo Sapiens (Human)
(E)	SCOPe Fold/ CATH Superfamily	Structural information on Fold/Superfamily of proteins obtained from SCOPe/ CATH databases
(F)	ProBis_Z-Score	Z-score values
NA : The PDB entry is not available in SCOPe as well as CATH; NN: The PDB entry is not available in SCOPe but is listed in CATH. However, no name has been assigned to its class yet.

## Sheet: Table_S1a
Table S1a: List of structural neighbours of Mpro obtained from DALI search
Sl. No.	UniProt ID	PDB ID
1	P0DTD1	6y84:A,5r83:A,5r82:A,5r7z:A,5r7y:A,5r80:A,5r81:A,5r84:A,6m03:A,6lu7:A
2	Q692E5	2gz8:A
3	Q1EFP6	2gt7:A,2gt7:B
4	Q6RCY8	2gz9:A
5	Q6RCZ9	2gz7:A
6	A7J8L3	2vj1:A,2vj1:B
7	Q6T1E9	2op9:A,2op9:B,2gtb:A,2gt8:A
8	V9TU12	4ylu:D,4ylu:A,4ylu:C,4ylu:B,4rsp:A
9	R4JK63	4zuh:A,5zqg:A,4zuh:B,5zqg:B
10	K4L9I6	4xfq:A,4xfq:B
11	P0C6X5	6fv2:C,6fv2:A,5nh0:B,6fv2:B,6fv1:C,5nh0:C,5nh0:A,6fv1:B,6fv1:A
12	P0C6X9	6jij:A,6jij:B,6jij:C
13	P0C6W3	4yoj:A,4yoi:A,4yoj:B,4yog:A,4yoi:B,4yog:B,4yo9:A,4yo9:B
14	P0C6U2	2zu2:A,1p9s:A,2zu2:B,1p9s:B
15	P0C6X1	1p9s:A,1p9s:B
16	P0C6U3	3d23:D,3d23:C,3d23:B,3d23:A
17	U6BPB2	5hyo:A,5hyo:B
18	K9N638	5wkl:A,5wkj:A,5wkk:A,5wkm:A
19	P0C6V6	5gwz:B,5gwz:A
20	P0C6T4	2yna:B,2ynb:B,2ynb:A,2yna:A
21	V9TU05	5c3n:A,5c3n:B
22	P0C6V2	1p9u:B,4f49:B,1lvo:B,1p9u:F,1p9u:D,4f49:D,1p9u:C,1lvo:D,1lvo:C,1p9u:A,1p9u:E,2amp:B,4f49:C,4f49:A,1lvo:F,2amp:A,1lvo:E,1lvo:A
23	P0C6Y5	1p9u:B,1lvo:B,1p9u:F,1p9u:D,1p9u:C,1lvo:D,1lvo:C,1p9u:A,1p9u:E,2amp:B,1lvo:F,2amp:A,1lvo:E,1lvo:A
24	P0C6U6	3tlo:B,5gwy:B,3tlo:A,5gwy:A
25	Q98VG9	4zro:A,4zro:D,4zro:C,4zro:B,5eu8:A
26	W6A941	4wmf:B,4wme:C,4wmf:A,4wmd:C,4wmd:B,4wme:B,4wme:D,4wme:A,4wmd:A,4wmf:C
27	P0C6Y3	2q6f:A,2q6f:B,2q6d:B,2q6d:A,2q6d:C
28	Q6JH47	2k7x:A
29	P0C6U8	3aw1:A,2a5k:A,3vb7:B,3vb4:B,3vb4:A,3aw1:B,3vb5:B,3vb6:B,2duc:A,3ea7:A,3m3s:A,2h2z:A,3e91:A,2hob:A,2op9:A,3vb7:A,1wof:B,3atw:A,2amq:A,3vb3:A,3snd:B,4mds:A,3vb6:A,2gt7:A,3vb5:A,3eaj:B,3ea7:B,1wof:A,3ea8:A,2amd:B,2amq:B,4hi3:B,2z3d:A,2gz8:A,2c3s:A,2gt7:B,3tiu:A,3szn:A,2z3c:A,3vb3:B,2gz9:A,2zu5:A,1uj1:A,3v3m:A,1uj1:B,3eaj:A,3ea9:A,2zu4:A,2gz7:A,2a5k:B,2amd:A,1uk4:A,2a5a:A,2z3e:A,2gx4:A,3snb:A,3tns:A,…
30	F8RL29	5lak:B,5lak:C,5lak:A,5lac:B,5lac:A,5lak:D
31	P04517	1lvb:B,1lvb:A,1q31:B,1lvm:B,1lvm:A,1q31:A
32	P09814	3mmg:A,3mmg:B
33	P19811	1mbm:A
34	P09331	1due:A,1dua:A
35	P9WHR9	3k6y:A
36	P13901	2a4o:A,2cxv:A
37	O43464	1lcy:A
38	Q9EXR9	1p3c:A
39	P83110	4ri0:A
40	O22609	3qo6:B
41	Q9SEL7	4ic5:A
42	Q99V45	1qy6:A
43	Q92743	3nwu:B,3nzi:A
44	O53896	1y8t:B,2z9i:A,1y8t:A
45	L0RUV7	5c2z:B
46	P09332	1qtf:A
47	Q2W8Q2	5hma:A
48	P08617	2h9h:A,2h6m:A,2hal:A,1hav:A,1qa7:B,1qa7:A,1qa7:D,1qa7:C,1hav:B
49	Q83883	5e0g:A
50	A0A384LFU1	5jd8:A
51	P39099	3sti:A
52	P00738	4wjg:W,4wjg:H,4wjg:M
53	Q9DU47	1wqs:A
54	P0C6X7	2z9j:B,2z9k:A,2a5k:A,2duc:A,2h2z:A,2hob:A,2z9j:A,2op9:A,1wof:B,2amq:A,2z9l:B,2gt7:A,1wof:A,2amd:B,2amq:B,2q6g:B,2z3d:A,2gz8:A,2z9k:B,2c3s:A,2q6g:A,4wy3:A,2gt7:B,5c5o:A,2z3c:A,5n19:A,2gz9:A,5c5n:A,1uj1:A,4twy:A,1uj1:B,2qiq:A,5b6o:B,2gz7:A,2a5k:B,2amd:A,2z94:A,1uk4:A,2a5a:A,2z3e:A,2gx4:A,2z9g:A,2z9l:A,2op9:B,2alv:A,3d62:A,4tww:A,1uk4:B,2a5i:A,2vj1:A,2d2d:B,2duc:B,2qc2:A,2v6n:A,5n5o:A,2d2d:A,1q2w:A,…
55	Q9WZ41	1l1j:A
56	Q9UL52	2oq5:A
57	P00736	2qy0:B,2qy0:D,1md8:A,1gpz:A
58	Q8SPS7	4f4o:F,4f4o:L,4f4o:I,4f4o:C
59	Q6VPT6	3h7o:A
60	P07204	5to3:B
61	P04070	1aut:C,3f6u:H
62	P24664	5dk1:A,4m7g:A
63	P19221	2pux:B,2ocv:B,3hk3:B,3edx:F,3hk6:B,3hk6:D,3edx:B,2pv9:B,3hki:E,3hki:B,3edx:D
64	P24158	1fuj:A,1fuj:D,1fuj:C
65	P20160	1fy1:A
66	P06681	2i6q:A
67	Q2FXC4	2as9:A
68	Q53782	2as9:A
69	P00775	1oss:A,1os8:A
70	P80219	1euf:A
71	P08246	1b0f:A,1h1b:A,5a0c:B,6e69:B,3q76:B,1h1b:B,6f5m:B
72	P00770	3rp2:A,3rp2:B
73	P06870	1spj:A
74	Q54137	5kwm:A,5dkm:A,5dj7:A
75	Q91516	1bqy:A,1bqy:B
76	Q7SIG2	1eq9:A
77	P98072	1ekb:B
78	P98119	1a5i:A
79	P08897	1hyl:A
80	P35049	1gdu:A,1pq8:A,1fy5:A,1pq5:A
81	P03953	5fcr:B
82	P98073	4dgj:A,4dgj:C,4dgj:D,4dgj:B
83	P35033	1a0j:A,1a0j:C,1a0j:B,1a0j:D
84	P51124	2zgh:A,2zgj:A,2zks:A,2zgc:A
85	P23946	4afu:A
86	P20231	2fs9:A,2fs8:D,2fww:D,2za5:B,2za5:D,2fxr:D,2gdd:D,2fxr:B,2fww:A,2fs9:D,2fs9:C,2gdd:B,2fs8:C,2gdd:C,2fs8:B,2bm2:B,2fpz:D,1a0l:D,2fww:C,2fxr:C,2bm2:A,2fs8:A,2gdd:A,1a0l:B,2fpz:B,2za5:A,3v7t:A,3v7t:C,2bm2:D,2fpz:C,2za5:C,1a0l:A,2fww:B,2fxr:A,3v7t:B,2fpz:A,2fs9:B,1a0l:C,3v7t:D,2bm2:C
87	Q04756	2r0l:A,2r0k:A,1yc0:A,2wuc:A,3k2u:A,2wub:A,1ybw:B,1ybw:A
88	P09872	2aiq:A,2aip:A
89	O00187	1q3x:A,1q3x:B,1zjk:A
90	P18291	1fi8:A,1fi8:B
91	D0VWT7	3cp7:A
92	Q3HR18	1ym0:A
93	Q99895	4h4f:A
94	Q16651	3gym:A,3gym:B,3dfl:A,3e0p:B,3e16:B,3fvf:B,3e0n:B,3dfj:A,3gyl:B,3e1x:B
95	X5CZS0	5hm2:D,5hm2:A,5hm2:E,5hm2:C,5hm2:B
96	Q61955	1npm:A,1npm:B
97	P14210	1shy:A
98	P22891	3f1s:B,3h5c:B
99	O43240	5lpf:A,5lpe:A,5lpe:B,5lpf:B
100	P03306	2j92:B,2wv4:A,2wv5:A,2wv5:D,2wv5:B,2wv4:B,2wv5:C,2bhg:B,2bhg:A,2j92:A
101	Q15661	5f03:A,4a6l:D,5wi6:D,5wi6:A,2zec:B,2zec:A,4mpw:B,2zec:D,5wi6:B,5wi6:C,2zec:C,2f9o:B,4mpv:B,4a6l:C,1lto:A,4mpu:B,6o1f:A,5f03:B,2f9n:B,4mpx:A,4mpv:A,2f9n:D,2zeb:D,2zeb:A,4mpw:A,4mqa:A,2zeb:B,4a6l:A,4mpx:B,4mpu:A,4a6l:B,2f9p:C,2f9o:D,2f9o:A,2f9p:A,2f9p:D,2f9n:C,2f9o:C,2f9p:B,2f9n:A,2zeb:C,4mqa:B,1lto:D,1lto:C,1lto:B
102	Q8N2U3	6har:A
103	P26262	5gvt:B,6a8o:B,6a8o:A,5gvt:A
104	P16049	2eek:A
105	Q6UWY2	4q7x:B,4q80:B
106	P26927	4qt8:C,2asu:B
107	P08419	1bru:P
108	Q9I8X1	1op2:A,1op0:A
109	Q9GL10	1fiw:A
110	A4UWM5	3w94:B,3w94:A
111	P16293	1pfx:C,1x7a:C
112	B3Y8K6	2zps:A
113	P00763	1slu:B,1slw:B,1f7z:A,1f5r:A,1co7:E,1slx:B,1slv:B,3tgi:E,1ykt:A,1ezu:C,3tgj:E,1fy8:E,1ezs:D,1ezu:D,1yld:A,1ylc:A,1trm:A,1j17:T,1amh:A,3fp6:E,3fp7:E,1brc:E,1brb:E,1amh:B,3tgk:E,1bra:A,1ezs:C,1k9o:E,1j14:A,1anb:A,3fp8:E,1j15:A,1trm:B,1ql9:A,1and:A,1j16:A,1anc:A,2trm:A,1ane:A,1dpo:A
114	P06869	6a8g:A
115	P20151	4nfe:A,4nff:A
116	P18965	3s9a:A,3s9b:A,3sbk:A,3s9c:A
117	Q9KSQ6	4lk4:A
118	Q8MX72	1m9u:B,1m9u:A
119	P0AEE3	3lgu:A,1soz:C,1te0:A,3gdv:A
120	Q9EB08	1zyo:A
121	P00751	1rtk:A,1dle:A
122	P35030	4u32:A,3p95:A,4dg4:B,2r9p:D,6bx8:C,2r9p:A,3l33:C,2r9p:C,4dg4:A,5c67:A,4dg4:G,4dg4:D,6gfi:A,3p92:A,3l3t:C,3l33:D,4u30:D,2r9p:B,5tp0:A,6bx8:A,3l33:B,3l3t:B,3l3t:D,6bx8:E,6bx8:G,1h4w:A,5c67:B,3l3t:A,3l33:A,6gfi:B,4u30:B,4u30:C,5jbt:A,4u30:A
123	P07477	4wwy:A,4wwy:B,4wxv:B,1trn:B,1trn:A,1fxy:A,2ra3:B,4wxv:A,2ra3:A
124	P35031	1utm:A,1bzx:E,1utj:A,2stb:E,2sta:E,1utk:A,1bit:A,1utl:M,2tbs:A,1hj8:A
125	P08001	1fiz:A
126	P00748	6b77:B,6qf7:D,4xde:A
127	Q8AV11	1mbq:A,2zpq:A,2zpq:B
128	P48740	4iw4:E,3gov:B,4djz:B,4djz:D,4igd:A
129	O60259	5ms4:C,5ms4:A,5ms4:D,5ms3:A,5ms4:B
130	P00750	1rtf:B,1a5h:B,1a5h:A,5zlz:E,5brr:E,1bda:A,1bda:B
131	Q9Y5K2	4k1e:A,4k8y:A,6nvb:A,2bdg:A,2bdh:A,6kbr:A,4kga:A,4kel:A,2bdi:A,6o21:A
132	Q91VE3	6ahs:A,5zfi:A,5zfh:A
133	P05981	1p57:B,1o5e:H,1o5f:H,1z8g:A,3t2n:B,5ce1:A,3t2n:A
134	P36368	1ao5:A
135	B3Y8K5	2zpr:A,2zpr:B
136	P03952	2any:A,4ogy:B,5f8t:A,2anw:A,4ogx:A,6o1g:A,5f8z:A,5f8x:A,4ogy:A,5tjx:A,6o1s:E,6i44:A
137	J7LCB0	5xrf:A
138	Q7SIG3	1elt:A
139	Q7SZE1	3s69:A
140	P00759	1ton:A
141	Q9Y337	2psy:A,2psx:A,6qfe:A,6qfe:B
142	P00756	1sgf:G,1sgf:Z
143	P03315	1dyl:A,1vcp:A
144	P00743	1kig:H
145	P05156	5o32:I
146	P00740	1rfn:A,5jbc:S,3lc5:A,4z0k:A,4yzu:A,6rfk:S,5jb9:S,2wpl:S,2wpi:S,5jbb:S,5jb8:S,5tnt:A,4zae:A,2wph:S,3kcg:H,5egm:A,2wpj:S,2wpk:S,5jba:S,5tno:A,3lc3:C,3lc3:A,2wpm:S,6mv4:H
147	F6YBP7	4d9q:B
148	P49863	1mza:A
149	I4CHP3	4e7n:A
150	P49862	5fah:A,5y9l:A,2qxh:A,2qxi:A,2qxj:A,2qxg:A,5yjk:A,3bsq:A,3bsq:C,2qxg:B,3bsq:B
151	P00777	1ct0:E
152	P03316	1svp:A
153	P00746	6qmr:E,6qmr:B,6qmr:D,2xwa:B,6fuj:B,1dfp:A,4cbo:B,6qmt:B,1dfp:B,1dic:A,1dsu:A,5tca:E,5tcc:E,5tca:B,1dsu:B,6fug:B,6fuj:E,5tcc:B,4cbn:B,1fdp:B
154	P05769	2wv9:A
155	Q52V24	4bnr:A,2f91:A,4bnr:B
156	Q2TN89	2vbc:A
157	A6GWM2	5jxf:A,5jxf:D,5jxf:C,5jxf:B
158	P12544	1op8:A
159	P00776	5sga:E
160	P03951	4crc:A,3sor:A,1xxf:A,5qtt:A,4d7g:A,6aod:C,5tkt:A,1xx9:A,4crf:A,1xxd:A,5exn:A,5q0f:A,4x6p:A,1zpc:A,1zlr:A,1xxf:B,5qck:A,5qcn:A,5qcm:A,5qcl:A,4x6n:A,4na7:A,1zpz:A,4ty6:A,5q0d:A,4d7f:A,4x6o:A,5tks:A,4crg:A,5qqp:A,4d76:A,5e2p:A,5q0h:A,5qqo:A,4crd:A,3bg8:A,4cre:A,4y8x:A,5exm:A,5wb6:A,6hhc:A,1zhr:A,1zpb:A,5tku:A,4crb:A,1ztj:A,5exl:A,5e2o:A,1zrk:A,4y8z:A,1zhm:A,4x6p:B,4ty7:A,4cr9:A,5q0e:A,1zmj:A,4wxi:A,…
161	H8XX12	5h4i:B,5h6v:B
162	Q7M3E1	1pyt:D
163	Q6H321	1gvz:A
164	Q9Y5Y6	1eax:A,4isl:A,3p8f:A,3ncl:A,4iso:A,3so3:A,6n4t:A,3p8g:A,4isn:A,2gv7:A,4is5:A,4jzi:A,3bn9:A,4jyt:A,3nps:A,1eaw:A,4r0i:A,2gv6:A,1eaw:C,4jz1:A,3bn9:B,4o9v:A,4o97:A,5lyo:A,5lyo:B,5lyo:C
165	P08709	5pa9:C,2b7d:H,2f9b:H,5u6j:H,1dva:H,1wss:H,5pa8:C,4zma:H,5pb1:D,1wqv:H,1dva:I,5pam:B,5pb4:C,2fir:H,5pav:C,1w8b:H,2c4f:H,2b8o:H,2zzu:H,5pat:B,4ylq:H,5pak:C,5paf:B,5pb0:B,4x8s:H,1w0y:H,5par:C,5pau:C,2zwl:H,4isi:H,3th4:H,5pag:B,4z6a:H,5pax:C,5pac:B,5paq:B,5paa:C,1fak:H,5pb2:C,5pai:B,5paj:B,5pae:B,1kli:H,1cvw:H,3ela:H,2aer:H,1w7x:H,4jzd:H,1dan:H,5tqf:H,1z6j:H,2flb:H,1w2k:H,4zxy:H,2bz6:H,4x8u:H,1wv7:H,…
166	P00772	1est:A,1fzz:A,4est:E,2cv3:A,3moc:A,1eau:A,3mo6:A,1ele:E,3mo3:A,8est:E,3hgn:A,1qix:B,1eai:A,6est:A,1qr3:E,1c1m:A,2fo9:A,3est:A,1nes:E,1bma:A,1eas:A,2fof:A,2fod:A,1e38:B,1eat:A,2fog:A,9est:A,2foh:A,1lkb:A,2fob:A,3mu5:A,2bd7:A,2de9:A,3mnb:A,3mns:A,1elc:A,5avd:A,1elb:A,2foa:A,2bd3:A,1hv7:A,3uou:A,6q8s:A,1qgf:A,1lka:A,1inc:A,1jim:A,2bd2:A,1hax:B,1e37:B,3mu1:A,1mmj:N,3mnc:A,3mu4:A,1fle:E,1elf:A,3odd:A,…
167	P05805	1pyt:C,1fon:A,1fon:B
168	P00742	1fxy:A,1p0s:H,4btu:B,1g2m:A,2vwm:B,2ei7:A,2vh6:A,4bti:B,4bti:F,5voe:H,1wu1:A,2d1j:A,4y71:A,1xkb:D,2w3i:A,3sw2:B,2j38:A,4btu:F,2vvu:A,2wyg:A,4zh8:A,2h9e:H,1mq6:A,2j34:A,2vwm:A,2xby:A,2p95:A,2p3t:B,2j2u:A,4y6d:A,2xc5:A,3cs7:A,4btt:B,2g00:A,3kl6:A,2j94:A,4zha:A,1iqj:A,2fzz:A,2p94:A,2wyj:A,4y7a:A,5k0h:A,3q3k:A,3ffg:A,3k9x:D,2vvc:B,4y79:A,2bok:A,2uwp:A,1iqm:A,1lqd:B,2y5h:A,1ezq:A,3tk6:A,4btt:F,1c5m:D,…
169	P09871	1elv:A,4j1y:B
170	P00749	1lmw:B,1gjd:B,1lmw:D,5xg4:U,1gja:B,1o5c:B,3ig6:B,4x1q:U,4zhm:U,4x1r:U,1o5a:B,4x0w:U,1gi7:B,1gi8:B,1gj9:B,1c5x:B,1c5w:B,1c5z:B,4zhl:U,1gi9:B,1gj8:B,4x1s:U,1gjb:B,1o5b:B,1gjc:B,1o3p:B,1gj7:B,2vnt:A,1c5y:B,4dw2:U
171	Q92876	6skd:B,6qhb:B,1l2e:A,1lo6:A,4d8n:A,6qfh:B,6qfg:B,6skc:B,6qhc:B,6qff:B,6qha:B,5nx3:A,6skb:C,6qh9:B,6qh9:A,6skd:A,6skc:A,6qfh:A,6qfg:A,3vfe:A,5nx1:A,6qhb:A,6qhc:A,6qff:A,6qha:A,6skb:A,6skb:B,1gvl:A
172	P00747	6d3y:A,6d40:A,6d3x:B,6d3x:A,1bml:A,3uir:B,5ugd:A,1bml:B,5ugg:A,6d3z:A,3uir:A,1bui:A,1bui:B,1rjx:B,4dur:A,4dur:B,1ddj:D,1ddj:C,1ddj:B,1l4z:A,4a5t:S,1qrz:D,1qrz:C,1qrz:B,1qrz:A,1ddj:A,4duu:A,1l4d:A
173	Q2YHF0	2wzq:A,5yvw:B,2whx:A,5yvv:B
174	Q5UB51	3u1j:B,3u1i:B,3u1i:D
175	P00778	4pro:A,3lpr:A
176	P17763	3l6p:A,3lkw:A
177	P33478	3l6p:A,3lkw:A
178	P0C0V0	2zle:C,1ky9:B,3cs0:A,2zle:B,2zle:A
179	B2RID1	5jwf:A,6jtc:A,6jtc:B,4y01:B,4y01:A,5jwf:B,6jtb:A,4y02:A,4y04:A,4xzy:A,4xzy:B
180	P00757	1sgf:A
181	Q8QW30	1dxw:A
182	O68900	4om9:A
183	P07288	2zch:P,2zcl:P,2zck:P,3qum:Q,3qum:P
184	A6N4I5	6fe6:A
185	Q81817	4jmy:B,4jmy:A
186	A0A140DLX4	5lc0:A,5lc0:B
187	A1Z093	2qv1:A,2qv1:B
188	B2Y2M9	3kf2:B,3kf2:A
189	C1KHN2	2xcf:A,2xcf:B
190	Q91RS4	2xcn:A,2xcn:B,2p59:A,2f9u:A,2a4q:C,2obo:A,2p59:B,2a4q:A,2obo:C,2f9u:C
191	P90191	2k1q:A,3kee:B,3kee:C,3kee:D,3kee:A
192	F8TEL4	5yvu:B,5yvj:B,5yw1:B,5yvy:B
193	P12823	4m9i:A,4m9t:A,4m9f:A,4m9k:A,4m9m:A
194	Q9WMX2	4u01:H,4u01:G,4u01:B,4u01:E,4u01:J,4u01:F,4u01:D,4u01:C,4u01:A
195	Q9ELS8	2fm2:A,3lox:A,3knx:A,3lon:A,3lon:C,2fm2:C,3knx:C,3lox:C
196	R9TEU1	5wdx:A
197	P26662	1dy9:A,1dy8:B,1dy9:B,1dy8:A,1w3c:A,1dxp:A,3oyp:B,4i33:B,1w3c:B,4i31:B,1dxp:B,3p8o:A,3p8n:B,3p8n:A,4ktc:A,3oyp:A,4ktc:C,4i32:B,4i32:A,4i31:A,3p8o:B,4i33:A,4a1v:A,4a1v:B,4a1t:A,4a1x:A,4a1x:B,4a1t:B
198	V5YM14	3woo:B,3woo:A,3woi:B,3won:A,3wol:B,3woj:B,3won:B,3wom:B,3woj:A,3woi:A,3wok:B,3wop:B,3wor:B,3wok:A,4y06:B,3wol:A,3woq:B,3wom:A,3woq:A,3wop:A,3wor:A,4y06:A
199	O90417	4r8t:B
200	Q0ZNA6	4k8b:A,4k8b:B,4tyd:E,4tyd:G,4tyd:L,4tyd:K,4tyd:F,4tyd:A,4tyd:M,4tyd:H,4tyd:C,4tyd:D,4tyd:J,4tyd:B
201	P06935	2fp7:B,2ggv:B,2ijo:B,3e90:D,3e90:B,5idk:A,5idk:B,5idk:C,2yol:A
202	F8WQK8	5jy0:A,5jwi:A,5jxp:A,5jxk:B,5jwi:B,5jxk:A,5jwg:A,5jwg:B
203	X2G809	4wf8:A
204	P45387	3syj:A
205	Q56VR3	4bxw:A,4bxw:B,4bxs:A
206	P04936	1cqq:A,2hrv:A
207	S4UY05	6nzt:A,6nzv:A
208	P44969	3h09:A,3h09:B
209	P26664	2a4g:A,3kn2:A,1rtl:A,2gvf:A,3eyd:A,2a4g:C,3kn2:C,1rtl:B,2gvf:C,3rc5:A,3eyd:C,3su4:B,3rc4:A,3su4:A
210	C1KIK8	6c2m:C,5etx:A,6c2m:D,5epn:A,6c2o:A,5etx:B,6c2m:A,5etx:C,6c2m:B,5epy:A,5etx:D,5eqq:A
211	Q32ZE1	5gj4:D,5gpi:D,5gj4:B,5yod:H,5gj4:H,5gj4:F,5yod:B,5yod:D,5gpi:H,5gpi:F,5yod:F,5gpi:B,5yof:B,5tfo:B,5t1v:A,5tfn:B,5tfo:A,5gxj:B,5gxj:A,5tfn:A,5t1v:B
212	A8DG50	3sue:D,3sue:C,3suf:C,3sv8:A,3sud:D,4nwk:A,3suf:B,3suf:D,3sud:C,3sue:B,4nwl:B,3suf:A,4nwl:A,6c2n:A,3m5l:A,3m5o:B,3m5n:C,3sv9:A,3sud:A,4wh8:A,4wh8:B,3sue:A,3su2:A,3su3:A,3sv7:A,3sud:B,3su0:A,3su6:A,3sug:A,4wh6:A,3su5:A,3sv6:A,3m5n:D,3su1:A,3m5n:B,3m5o:A,3rc6:A,3m5n:A,3m5m:A,3m5m:B
213	A0A0B4WYC6	6n4n:B,6n4n:A,5eqs:A,5esb:A,6diq:A,6div:A,6dit:A,6diw:A,6dir:A,5eqr:A,6dis:A,6cvw:A,6cvy:A,6diu:A,6cvx:A
214	Q5U8X5	5wx1:A
215	Q8VSL2	5j44:A,5j44:B
216	P27958	1rgq:B,2xni:B,2oin:B,2oc1:A,1rgq:A,2obq:A,1a1r:B,2xni:A,2oc7:A,2a4r:A,2oc8:A,1n1l:A,2obq:C,2obo:A,2oc0:A,2oin:A,2obo:C,2f9v:A,1a1r:A,1n1l:B,2oc0:C,2o8m:A,2oc7:C,2o8m:B,2oc1:C,2a4r:C,2oc8:C,2f9v:C,6bqj:B,6bqk:A,6bqk:B,6bqj:A,6bqj:C
217	Q7BSW5	3sze:A
218	P19712	5mz4:B,5mz4:A
219	Q91H74	2fom:B,6mo0:A,6mo2:A,6mo1:A,6mo1:B,6mo2:B,6mo0:B
220	Q9GRW0	2b9l:A
221	P00760	4niy:D,1f2s:E,1tgn:A,3rdz:A,1c9t:F,3btw:E,1o3a:A,1tpo:A,5fxl:A,3btg:E,5mnm:A,1c2m:A,1v2o:T,3bte:E,1v2r:T,1v2k:T,1c2l:A,3btk:E,6dwf:E,2zft:A,3ptb:A,1taw:A,1tyn:A,1jrt:A,5gib:A,1gi1:A,5mor:A,3m7q:A,3btf:E,1bju:A,1c2k:A,1v2w:T,1o39:A,3plb:A,1o3e:A,1v2n:T,5mo1:A,1v2t:T,1c5q:A,1o2k:A,1o2t:A,1o2s:A,1v2q:T,1y3y:A,2tgp:Z,3ptn:A,3otj:E,2zq1:A,3plk:A,3uqo:A,1ppe:E,1o3c:A,1o2m:A,4niy:C,3uop:A,4b1t:A,1may:A,…
222	Q99AU2	3o8c:B,3o8d:B,3o8d:A,3o8r:A,3o8b:B,3o8b:A,3o8r:B,3o8c:A
223	P14337	2m9p:A,2m9q:A
224	P26663	1ns3:B,1ns3:A,1jxp:A,1jxp:B,5fps:B,4b74:B,5fps:A,5fpy:B,4b76:B,4b6f:B,4b71:B,5fpt:B,4b71:A,4b6e:A,4b76:A,1cu1:B,4b73:B,4a92:B,4b74:A,5fpt:A,4b75:A,4a92:A,5fpy:A,1bt7:A,4b6f:A,4b6e:B,4b73:A,4b75:B,1cu1:A
225	P07338	2jet:B,1kdq:A
226	O88093	3ak5:A,1wxr:A,3ak5:D,3ak5:C,3ak5:B
227	P00766	2y6t:D,1acb:E,4q2k:D,2y6t:A,1gl0:E,3t62:A,1t8m:C,1gl1:A,1cgi:E,1dlk:B,4q2k:B,1cgj:E,1p2o:A,1p2o:C,3t62:C,1gcd:A,2y6t:C,1k2i:1,1p2n:C,1gl1:C,2y6t:B,1gl1:B,4q2k:C,1p2m:A,1p2m:C,1t8l:C,1p2n:A,1t8n:C,1p2q:C,1t7c:C,1t8o:C,4q2k:A,5j4q:A,1dlk:D,1t8o:A,5j4s:A,1t8l:A,1t8n:A,1t7c:A,3t62:B,1p2q:A,1t8m:A,2cga:B,1oxg:A,1chg:A,1ex3:A,2cga:A,1gg6:B,2p8o:B,4cha:B,2gmt:B,3gch:B,6cha:B,4cha:F,3gct:F,1n8o:B,1gct:B,…
228	P00734	1ths:H,1ghv:H,1hxf:H,1ca8:B,1mu8:B,2fes:H,1nrr:H,1wbg:B,5cmx:H,2c8w:B,5gds:H,3qgn:B,1fpc:H,1c5l:H,1a5g:H,2afq:D,1c1v:H,2a0q:B,3u8t:H,4rkj:B,1t4v:H,5l6n:H,1qbv:H,4h6s:B,1jou:B,3shc:H,2zdv:H,5af9:H,2c90:B,2bvs:H,1d3q:B,3u8r:H,1thr:H,1tbz:H,1iht:H,1hai:H,2jh5:D,1b5g:H,1tb6:H,1vr1:H,1a4w:H,2feq:H,1uvs:H,2jh6:D,1ypg:H,2anm:H,2bvx:H,3egk:H,2cn0:H,1sgi:E,4thn:H,1e0f:F,1ay6:H,1c4v:2,2ank:H,1sg8:E,3qtv:H,…
229	P00735	1ucy:N,3pmb:B,1tbq:K,1uvu:H,1id5:H,3pma:B,1mkw:H,1tbq:H,1uvt:H,1ycp:H,1bbr:K,3pma:D,1toc:B,1mkx:H,1bbr:N,1tbr:K,1ucy:K,1tbr:H,3pmb:D,1etr:H,1vit:H,1ett:H,1toc:D,2ody:B,1avg:H,1toc:F,2ody:D,1toc:H,1ets:H,1a0h:B,1hrt:H,2a1d:B,1a0h:E,1mkw:K,2a1d:F,1mkx:K,1ucy:H,1vit:F,1bbr:H,1ycp:K,1bbr:E,1ycp:M,1vit:G,1ucy:E
230	P00761	3myw:B,1an1:E,1c9p:A,1h9i:E,1ldt:T,3myw:A,1z7k:A,1eja:A,1tfx:B,1tfx:A,1avw:A,1qqu:A,1v6d:A,1mct:A,1fmg:A,4doq:E,1avx:A,1h9h:E,1tx6:B,1tx6:C,1tx6:D,5xwj:A,5xwj:B,1s6f:A,4an7:A,4doq:C,1tx6:A,1yf4:A,4doq:A,1s84:A,5xwl:A,2a31:A,2a32:A,5xwl:B,1s5s:A,1fni:A,1s81:A,1s85:A,1s82:A,1fn6:A,1s6h:A,1s83:A,1uhb:A,1aks:A,1uhb:B,1aks:B,1ept:C

## Sheet: Table_S1b
Table S1b: Details of structural neighbours of Mpro obtained from DALI search
[A] Sl. No.	[B] UniProt_ID	[C] Protein name	[D] Organism	[E] SCOPe Fold/ CATH Superfamily	[F] Dali_Z-Score
1	P0DTD1	Replicase polyprotein 1ab	Severe acute respiratory syndrome coronavirus 2 (2019-nCoV) (SARS-CoV-2)	NA	50.7
2	P0C6U8	Replicase polyprotein 1a	Human SARS coronavirus (SARS-CoV) (Severe acute respiratory syndrome coronavirus)	Trypsin-like serine proteases	46.1
3	P0C6X7	Replicase polyprotein 1ab	Human SARS coronavirus (SARS-CoV) (Severe acute respiratory syndrome coronavirus)	Trypsin-like serine proteases	46.1
4	Q6T1E9	Orf1ab polyprotein	SARS coronavirus CUHK-L2	Trypsin-like serine proteases	45.4
5	Q1EFP6	Orf1a polyprotein	SARS coronavirus BJ162	Trypsin-like serine proteases	45.3
6	Q692E5	Orf1a polyprotein	SARS coronavirus TJF	Trypsin-like serine proteases	45.1
7	Q6RCY8	Orf1a polyprotein	SARS coronavirus TW7	Trypsin-like serine proteases	45
8	Q6RCZ9	Orf1a polyprotein	SARS coronavirus TW6	Trypsin-like serine proteases	44.8
9	A7J8L3	Orf1a polyprotein	Human SARS coronavirus (SARS-CoV) (Severe acute respiratory syndrome coronavirus)	Trypsin-like serine proteases	44.6
10	W6A941	ORF1a	Middle East respiratory syndrome-related coronavirus	Trypsin-like serine proteases	41.7
11	K4L9I6	Polyprotein 1ab	Porcine epidemic diarrhea virus	Trypsin-like serine proteases	41.3
12	P0C6T4	Replicase polyprotein 1a	Bat coronavirus HKU4 (BtCoV) (BtCoV/HKU4/2004)	Trypsin-like serine proteases	41.3
13	R4JK63	Polyprotein	Porcine epidemic diarrhea virus	Trypsin-like serine proteases	41.3
14	P0C6W3	Replicase polyprotein 1ab	Bat coronavirus HKU4 (BtCoV) (BtCoV/HKU4/2004)	Trypsin-like serine proteases	41.2
15	V9TU12	Orf1a	Middle East respiratory syndrome-related coronavirus	Trypsin-like serine proteases	41.2
16	Q98VG9	Replicase polyprotein 1ab	Feline coronavirus (strain FIPV WSU-79/1146) (FCoV)	Trypsin-like serine proteases	41.2
17	P0C6U3	Replicase polyprotein 1a	Human coronavirus HKU1 (isolate N1) (HCoV-HKU1)	Trypsin-like serine proteases	41.1
18	P0C6X5	Replicase polyprotein 1ab	Human coronavirus NL63 (HCoV-NL63)	NA	40.9
19	P0C6X9	Replicase polyprotein 1ab	Murine coronavirus (strain A59) (MHV-A59) (Murine hepatitis virus)	NN	40.8
20	P0C6U6	Replicase polyprotein 1a	Human coronavirus NL63 (HCoV-NL63)	Trypsin-like serine proteases	40.8
21	K9N638	Replicase polyprotein 1a	Middle East respiratory syndrome-related coronavirus (isolate United Kingdom/H123990006/2012) (Betacoronavirus England 1) (Human coronavirus EMC)	NN	40.6
22	P0C6U2	Replicase polyprotein 1a	Human coronavirus 229E (HCoV-229E)	Trypsin-like serine proteases	40.6
23	P0C6X1	Replicase polyprotein 1ab	Human coronavirus 229E (HCoV-229E)	Trypsin-like serine proteases	40.5
24	P0C6V2	Replicase polyprotein 1a	Porcine transmissible gastroenteritis coronavirus (strain Purdue) (TGEV)	Trypsin-like serine proteases	40.1
25	P0C6Y5	Replicase polyprotein 1ab	Porcine transmissible gastroenteritis coronavirus (strain Purdue) (TGEV)	Trypsin-like serine proteases	40.1
26	U6BPB2	Polyprotein 1a	Porcine epidemic diarrhea virus	Trypsin-like serine proteases	40.1
27	P0C6V6	Replicase polyprotein 1a	Porcine epidemic diarrhea virus (strain CV777) (PEDV)	NA	40
28	V9TU05	Orf1a	Middle East respiratory syndrome-related coronavirus	Trypsin-like serine proteases	40
29	P0C6Y3	Replicase polyprotein 1ab	Avian infectious bronchitis virus (strain M41) (IBV)	Trypsin-like serine proteases	38.7
30	Q6JH47	Orf1a polyprotein	SARS coronavirus Sino1-11	NA	20.2
31	F8RL29	Replicase polyprotein 1ab	Alphamesonivirus 1 (isolate Aedes harrisoni/Cote d'Ivoire/C79/2004) (CAVV) (Cavally virus (isolate C79))	NA	15.1
32	P04517	Genome polyprotein	Tobacco etch virus (TEV)	Trypsin-like serine proteases	14.5
33	P09814	Genome polyprotein	Tobacco vein mottling virus (TVMV)	Trypsin-like serine proteases	13.9
34	P19811	Replicase polyprotein 1ab	Equine arteritis virus (strain Bucyrus) (EAV)	Trypsin-like serine proteases	13.1
35	Q92743	Serine protease HTRA1	Homo sapiens (Human)	Trypsin-like serine proteases	13.1
36	P04936	Genome polyprotein	Human rhinovirus 2 (HRV-2)	Trypsin-like serine proteases	12.7
37	P08617	Genome polyprotein	Human hepatitis A virus genotype IB (isolate HM175) (HHAV) (Human hepatitis A virus (isolate HumaNAustralia/HM175/1976))	Trypsin-like serine proteases	12.7
38	P09331	Exfoliative toxin A	Staphylococcus aureus	Trypsin-like serine proteases	12.7
39	P9WHR9	Serine protease Rv3671c	Mycobacterium tuberculosis (strain ATCC 25618 / H37Rv)	Trypsin-like serine proteases	12.7
40	P13901	Genome polyprotein	Human hepatitis A virus genotype IB (isolate MBB) (HHAV) (Human hepatitis A virus (isolate Human/Northern Africa/MBB/1978))	Trypsin-like serine proteases	12.6
41	O43464	Serine protease HTRA2, mitochondrial	Homo sapiens (Human)	PDZ domain-like	12.4
42	O53896	Probable serine protease PepD	Mycobacterium tuberculosis (strain ATCC 25618 / H37Rv)	PDZ domain-like	12.3
43	Q9EXR9	Serine protease	Bacillus intermedius	Trypsin-like serine proteases	12.3
44	P83110	Serine protease HTRA3	Homo sapiens (Human)	Trypsin-like serine proteases	12.3
45	Q9SEL7	Protease Do-like 5, chloroplastic	Arabidopsis thaliana (Mouse-ear cress)	Trypsin-like serine proteases	12.1
46	O22609	Protease Do-like 1, chloroplastic	Arabidopsis thaliana (Mouse-ear cress)	Trypsin-like serine proteases	12.1
47	Q99V45	Glutamyl endopeptidase	Staphylococcus aureus (strain Mu50 / ATCC 700699)	Trypsin-like serine proteases	12
48	L0RUV7	Serine protease	Staphylococcus aureus	Trypsin-like serine proteases	11.9
49	P00734	Prothrombin	Homo sapiens (Human)	Trypsin-like serine proteases	11.9
50	P09332	Exfoliative toxin B	Staphylococcus aureus	Trypsin-like serine proteases	11.9
51	P48740	Mannan-binding lectin serine protease 1	Homo sapiens (Human)	Trypsin-like serine proteases	11.9
52	Q8SPS7	Haptoglobin	Sus scrofa (Pig)	Trypsin-like serine proteases	11.9
53	Q2W8Q2	Probable membrane transporter protein MamO	Magnetospirillum magneticum (strain AMB-1 / ATCC 700264)	Trypsin-like serine proteases	11.8
54	P00738	Haptoglobin	Homo sapiens (Human)	Trypsin-like serine proteases	11.8
55	A0A384LFU1	Protease	Yersinia pestis	PDZ domain-like	11.7
56	P0AEE3	Serine endoprotease DegS	Escherichia coli (strain K12)	PDZ domain-like	11.7
57	Q83883	Genome polyprotein	Norwalk virus (strain GI/Human/United States/Norwalk/1968) (Hu/NV/NV/1968/US)	Trypsin-like serine proteases	11.7
58	P00736	Complement C1r subcomponent	Homo sapiens (Human)	Trypsin-like serine proteases	11.6
59	P39099	Periplasmic pH-dependent serine endoprotease DegQ	Escherichia coli (strain K12)	Trypsin-like serine proteases	11.6
60	P19221	Prothrombin	Mus musculus (Mouse)	Trypsin-like serine proteases	11.5
61	P00735	Prothrombin	Bos taurus (Bovine)	Trypsin-like serine proteases	11.4
62	Q9DU47	Polyprotein	Chiba virus (strain GI/Human/Japan/Chiba 407/1987) (Hu/NLV/Chiba 407/1987/JP)	Trypsin-like serine proteases	11.4
63	P05981	Serine protease hepsin	Homo sapiens (Human)	Trypsin-like serine proteases	11.3
64	Q04756	Hepatocyte growth factor activator	Homo sapiens (Human)	Trypsin-like serine proteases	11.3
65	Q9UL52	Transmembrane protease serine 11E	Homo sapiens (Human)	Trypsin-like serine proteases	11.3
66	Q9WZ41	Heat shock serine protease, periplasmic	Thermotoga maritima (strain ATCC 43589 / MSB8 / DSM 3109 / JCM 10099)	Trypsin-like serine proteases	11.3
67	P20231	Tryptase beta-2	Homo sapiens (Human)	Trypsin-like serine proteases	11.2
68	P03306	Genome polyprotein	Foot-and-mouth disease virus (strain A10-61) (Aphthovirus A) (FMDV)	Trypsin-like serine proteases	11.1
69	P24664	Trypsin	Saccharopolyspora erythraea (Streptomyces erythraeus)	Trypsin-like serine proteases	11.1
70	P51124	Granzyme M	Homo sapiens (Human)	Trypsin-like serine proteases	11.1
71	Q15661	Tryptase alpha/beta-1	Homo sapiens (Human)	Trypsin-like serine proteases	11.1
72	Q16651	Prostasin	Homo sapiens (Human)	Trypsin-like serine proteases	11.1
73	X5CZS0	Genome polyprotein	Foot-and-mouth disease virus - type SAT 2	Trypsin-like serine proteases	11.1
74	P00747	Plasminogen	Homo sapiens (Human)	Trypsin-like serine proteases	11
75	P00750	Tissue-type plasminogen activator	Homo sapiens (Human)	Trypsin-like serine proteases	11
76	P00751	Complement factor B	Homo sapiens (Human)	Trypsin-like serine proteases	11
77	P08246	Neutrophil elastase	Homo sapiens (Human)	Trypsin-like serine proteases	11
78	P24158	Myeloblastin	Homo sapiens (Human)	Trypsin-like serine proteases	11
79	P35033	Trypsin-3	Salmo salar (Atlantic salmon)	Trypsin-like serine proteases	11
80	P35049	Trypsin	Fusarium oxysporum (Fusarium vascular wilt)	Trypsin-like serine proteases	11
81	Q6VPT6	Group 3 allergen SMIPP-S Yv6023A04	Sarcoptes scabiei (Itch mite) (Acarus scabiei)	Trypsin-like serine proteases	11
82	Q9Y5Y6	Suppressor of tumorigenicity 14 protein	Homo sapiens (Human)	Trypsin-like serine proteases	11
83	P07204	Thrombomodulin	Homo sapiens (Human)	Laminin	10.9
84	O43240	Kallikrein-10	Homo sapiens (Human)	Trypsin-like serine proteases	10.9
85	P00749	Urokinase-type plasminogen activator	Homo sapiens (Human)	Trypsin-like serine proteases	10.9
86	P00760	Cationic trypsin	Bos taurus (Bovine)	Trypsin-like serine proteases	10.9
87	P00763	Anionic trypsin-2	Rattus norvegicus (Rat)	Trypsin-like serine proteases	10.9
88	P00766	Chymotrypsinogen A	Bos taurus (Bovine)	Trypsin-like serine proteases	10.9
89	P04070	Vitamin K-dependent protein C	Homo sapiens (Human)	Trypsin-like serine proteases	10.9
90	P26927	Hepatocyte growth factor-like protein	Homo sapiens (Human)	Trypsin-like serine proteases	10.9
91	Q6UWY2	Serine protease 57	Homo sapiens (Human)	Trypsin-like serine proteases	10.9
92	P0C0V0	Periplasmic serine endoprotease DegP	Escherichia coli (strain K12)	PDZ domain-like	10.8
93	O00187	Mannan-binding lectin serine protease 2	Homo sapiens (Human)	Trypsin-like serine proteases	10.8
94	P00748	Coagulation factor XII	Homo sapiens (Human)	Trypsin-like serine proteases	10.8
95	P00770	Mast cell protease 2	Rattus norvegicus (Rat)	Trypsin-like serine proteases	10.8
96	P00775	Trypsin	Streptomyces griseus	Trypsin-like serine proteases	10.8
97	P03952	Plasma kallikrein	Homo sapiens (Human)	Trypsin-like serine proteases	10.8
98	P07477	Trypsin-1	Homo sapiens (Human)	Trypsin-like serine proteases	10.8
99	P09872	Protein C activator	Agkistrodon contortrix contortrix (Southern copperhead)	Trypsin-like serine proteases	10.8
100	P20160	Azurocidin	Homo sapiens (Human)	Trypsin-like serine proteases	10.8
101	P80219	Duodenase-1	Bos taurus (Bovine)	Trypsin-like serine proteases	10.8
102	P98073	Enteropeptidase	Homo sapiens (Human)	Trypsin-like serine proteases	10.8
103	Q2FXC4	Serine protease SplC	Staphylococcus aureus (strain NCTC 8325)	Trypsin-like serine proteases	10.8
104	Q53782	Serine protease SplC	Staphylococcus aureus	Trypsin-like serine proteases	10.8
105	Q54137	Trypsin-like protease	Saccharopolyspora erythraea (Streptomyces erythraeus)	Trypsin-like serine proteases	10.8
106	P22891	Vitamin K-dependent protein Z	Homo sapiens (Human)	Trypsin-like serine proteases	10.8
107	P06681	Complement C2	Homo sapiens (Human)	Trypsin-like serine proteases	10.8
108	P00746	Complement factor D	Homo sapiens (Human)	Trypsin-like serine proteases	10.7
109	P00761	Trypsin	Sus scrofa (Pig)	Trypsin-like serine proteases	10.7
110	P06870	Kallikrein-1	Homo sapiens (Human)	Trypsin-like serine proteases	10.7
111	P35030	Trypsin-3	Homo sapiens (Human)	Trypsin-like serine proteases	10.7
112	P35031	Trypsin-1	Salmo salar (Atlantic salmon)	Trypsin-like serine proteases	10.7
113	P49862	Kallikrein-7	Homo sapiens (Human)	Trypsin-like serine proteases	10.7
114	Q91516	Venom plasminogen activator TSV-PA	Trimeresurus stejnegeri (Chinese green tree viper) (Viridovipera stejnegeri)	Trypsin-like serine proteases	10.7
115	P00740	Coagulation factor IX	Homo sapiens (Human)	Trypsin-like serine proteases	10.6
116	P03951	Coagulation factor XI	Homo sapiens (Human)	Trypsin-like serine proteases	10.6
117	P03953	Complement factor D	Mus musculus (Mouse)	Trypsin-like serine proteases	10.6
118	P08897	Collagenase	Hypoderma lineatum (Early cattle grub) (Common cattle grub)	Trypsin-like serine proteases	10.6
119	P16293	Coagulation factor IX	Sus scrofa (Pig)	Trypsin-like serine proteases	10.6
120	P18291	Granzyme B	Rattus norvegicus (Rat)	Trypsin-like serine proteases	10.6
121	P26262	Plasma kallikrein	Mus musculus (Mouse)	Trypsin-like serine proteases	10.6
122	P98072	Enteropeptidase	Bos taurus (Bovine)	Trypsin-like serine proteases	10.6
123	P98119	Salivary plasminogen activator alpha 1	Desmodus rotundus (Vampire bat)	Trypsin-like serine proteases	10.6
124	Q7SIG2	Chymotrypsin-1	Solenopsis invicta (Red imported fire ant) (Solenopsis wagneri)	Trypsin-like serine proteases	10.6
125	P23946	Chymase	Homo sapiens (Human)	Trypsin-like serine proteases	10.6
126	Q91VE3	Kallikrein-7	Mus musculus (Mouse)	NA	10.5
127	A4UWM5	Enteropeptidase-1	Oryzias latipes (Japanese rice fish) (Japanese killifish)	Trypsin-like serine proteases	10.5
128	P20151	Kallikrein-2	Homo sapiens (Human)	Trypsin-like serine proteases	10.5
129	Q3HR18	Lumbrokinase F238	Eisenia fetida (Red wiggler worm)	Trypsin-like serine proteases	10.5
130	Q61955	Kallikrein-8	Mus musculus (Mouse)	Trypsin-like serine proteases	10.5
131	Q8AV11	Anionic trypsin	Oncorhynchus keta (Chum salmon) (Salmo keta)	Trypsin-like serine proteases	10.5
132	Q92876	Kallikrein-6	Homo sapiens (Human)	Trypsin-like serine proteases	10.5
133	D0VWT7	Alkaline serine protease AL20	Nesterenkonia aethiopica	Trypsin-like serine proteases	10.5
134	Q99895	Chymotrypsin C	Homo sapiens (Human)	Trypsin-like serine proteases	10.5
135	Q8N2U3	PRSS3 protein	Homo sapiens (Human)	NA	10.4
136	B3Y8K5	Anionic trypsin isoform 2	Oncorhynchus keta (Chum salmon) (Salmo keta)	Trypsin-like serine proteases	10.4
137	P00742	Coagulation factor X	Homo sapiens (Human)	Trypsin-like serine proteases	10.4
138	P09871	Complement C1s subcomponent	Homo sapiens (Human)	Trypsin-like serine proteases	10.4
139	P14210	Hepatocyte growth factor	Homo sapiens (Human)	Trypsin-like serine proteases	10.4
140	P16049	Trypsin-1	Gadus morhua (Atlantic cod)	Trypsin-like serine proteases	10.4
141	P18965	Factor V activator RVV-V gamma	Daboia siamensis (Eastern Russel's viper) (Daboia russelii siamensis)	Trypsin-like serine proteases	10.4
142	Q8MX72	Fibrinolytic enzyme component A	Eisenia fetida (Red wiggler worm)	Trypsin-like serine proteases	10.4
143	Q9Y5K2	Kallikrein-4	Homo sapiens (Human)	Trypsin-like serine proteases	10.4
144	P06869	Urokinase-type plasminogen activator	Mus musculus (Mouse)	Laminin	10.3
145	A6GWM2	Asp/Glu-specific dipeptidyl-peptidase	Flavobacterium psychrophilum (strain JIP02/86 / ATCC 49511)	NA	10.3
146	O60259	Kallikrein-8	Homo sapiens (Human)	NA	10.3
147	B3Y8K6	Anionic trypsin isoform 3	Oncorhynchus keta (Chum salmon) (Salmo keta)	Trypsin-like serine proteases	10.3
148	P07288	Prostate-specific antigen	Homo sapiens (Human)	Trypsin-like serine proteases	10.3
149	P08419	Chymotrypsin-like elastase family member 2A	Sus scrofa (Pig)	Trypsin-like serine proteases	10.3
150	P08709	Coagulation factor VII	Homo sapiens (Human)	Trypsin-like serine proteases	10.3
151	Q9I8X1	Snake venom serine protease Dav-PA	Deinagkistrodon acutus (Hundred-pace snake) (Agkistrodon acutus)	Trypsin-like serine proteases	10.3
152	Q9Y337	Kallikrein-5	Homo sapiens (Human)	Trypsin-like serine proteases	10.3
153	Q9GL10	Acrosin	Ovis aries	Trypsin-like serine proteases	10.3
154	Q9EB08	Polyprotein	Sesbania mosaic virus	Trypsin-like serine proteases	10.2
155	Q9KSQ6	Trypsin, putative	Vibrio cholerae serotype O1 (strain ATCC 39315 / El Tor Inaba N16961)	Trypsin-like serine proteases	10.2
156	P08001	Acrosin	Sus scrofa (Pig)	Trypsin-like serine proteases	10.2
157	B2RID1	Asp/Glu-specific dipeptidyl-peptidase	Porphyromonas gingivalis (strain ATCC 33277 / DSM 20709 / CIP 103683 / JCM 12257 / NCTC 11834 / 2561)	NA	10.1
158	F8WQK8	Asp/Glu-specific dipeptidyl-peptidase	Porphyromonas endodontalis (strain ATCC 35406 / BCRC 14492 / JCM 8526 / NCTC 13058 / HG 370)	NA	10.1
159	J7LCB0	Snake venom serine protease Da-36	Deinagkistrodon acutus (Hundred-pace snake) (Agkistrodon acutus)	NA	10.1
160	P00756	Kallikrein 1-related peptidase b3	Mus musculus (Mouse)	Trypsin-like serine proteases	10.1
161	P00759	Tonin	Rattus norvegicus (Rat)	Trypsin-like serine proteases	10.1
162	P00772	Chymotrypsin-like elastase family member 1	Sus scrofa (Pig)	Trypsin-like serine proteases	10.1
163	P03315	Structural polyprotein	Semliki forest virus (SFV)	Trypsin-like serine proteases	10.1
164	P36368	Epidermal growth factor-binding protein type B	Mus musculus (Mouse)	Trypsin-like serine proteases	10.1
165	Q7SIG3	Elastase-1	Salmo salar (Atlantic salmon)	Trypsin-like serine proteases	10.1
166	Q7SZE1	Thrombin-like enzyme saxthrombin	Gloydius saxatilis (Rock mamushi) (Gloydius intermedius saxatilis)	Trypsin-like serine proteases	10.1
167	F6YBP7	Complement factor D	Macaca mulatta (Rhesus macaque)	Trypsin-like serine proteases	10
168	P00743	Coagulation factor X	Bos taurus (Bovine)	Trypsin-like serine proteases	10
169	Q52V24	Hepatopancreas trypsin	Astacus leptodactylus (Turkish narrow-clawed crayfish) (Pontastacus leptodactylus)	Trypsin-like serine proteases	10
170	P05156	Complement factor I	Homo sapiens (Human)	Trypsin-like serine proteases	10
171	I4CHP3	Thrombin-like enzyme AhV_TL-I	Gloydius halys (Chinese water mocassin) (Agkistrodon halys)	Trypsin-like serine proteases	9.9
172	P49863	Granzyme K	Homo sapiens (Human)	Trypsin-like serine proteases	9.9
173	Q32ZE1	Genome polyprotein	Zika virus (ZIKV)	Trypsin-like serine proteases	9.9
174	P05769	Genome polyprotein	Murray valley encephalitis virus (strain MVE-1-51) (MVEV)	NN	9.8
175	Q2YHF0	Genome polyprotein	Dengue virus type 4 (strain Thailand/0348/1991) (DENV-4)	NN	9.8
176	P00777	Streptogrisin-B	Streptomyces griseus	Trypsin-like serine proteases	9.8
177	P03316	Structural polyprotein	Sindbis virus (SINV)	Trypsin-like serine proteases	9.8
178	F8TEL4	Genome polyprotein	Dengue virus 4	NA	9.7
179	P06935	Genome polyprotein [Cleaved into: Peptide 2k; Capsid protein C	West Nile virus (WNV)	Trypsin-like serine proteases	9.7
180	Q2TN89	Genome polyprotein	Dengue virus 4	NN	9.6
181	H8XX12	Genome polyprotein	Zika virus (ZIKV)	Trypsin-like serine proteases	9.6
182	V5YM14	Dipeptidyl aminopeptidase BII	Pseudoxanthomonas mexicana	NA	9.5
183	P00776	Streptogrisin-A	Streptomyces griseus	Trypsin-like serine proteases	9.5
184	P12544	Granzyme A	Homo sapiens (Human)	Trypsin-like serine proteases	9.5
185	Q5UB51	Genome polyprotein [Cleaved into: Capsid protein C	Dengue virus type 3 (strain Singapore/8120/1995) (DENV-3)	Trypsin-like serine proteases	9.5
186	P05805	Proproteinase E	Bos taurus (Bovine)	Trypsin-like serine proteases	9.4
187	Q6H321	Kallikrein-1E2	Equus caballus (Horse)	Trypsin-like serine proteases	9.4
188	Q7M3E1	Chymotrypsin-C	Bos taurus (Bovine)	Trypsin-like serine proteases	9.4
189	P33478	Genome polyprotein	Dengue virus type 1 (strain Singapore/S275/1990) (DENV-1)	NA	9.3
190	Q56VR3	Venom prothrombin activator pseutarin-C catalytic subunit	Pseudonaja textilis (Eastern brown snake)	NA	9.3
191	P17763	Genome polyprotein	Dengue virus type 1 (strain Nauru/West Pac/1974) (DENV-1)	Trypsin-like serine proteases	9.3
192	P00778	Alpha-lytic protease	Lysobacter enzymogenes	Trypsin-like serine proteases	9.2
193	P90191	Genome polyprotein	Hepacivirus C	Trypsin-like serine proteases	9.2
194	O88093	Hemoglobin-binding protease hbp autotransporter	Escherichia coli	NN	9.1
195	P26662	Genome polyprotein	Hepatitis C virus genotype 1b (isolate Japanese) (HCV)	Trypsin-like serine proteases	9.1
196	Q91H74	Genome polyprotein	Dengue virus 2	Trypsin-like serine proteases	9.1
197	P26663	Genome polyprotein	Hepatitis C virus genotype 1b (isolate BK) (HCV)	Trypsin-like serine proteases	9
198	P00757	Kallikrein 1-related peptidase-like b4	Mus musculus (Mouse)	Trypsin-like serine proteases	8.9
199	P26664	Genome polyprotein	Hepatitis C virus genotype 1a (isolate 1) (HCV)	Trypsin-like serine proteases	8.9
200	P27958	Genome polyprotein	Hepatitis C virus genotype 1a (isolate H) (HCV)	Trypsin-like serine proteases	8.9
201	Q8QW30	Polyprotein	Hepatitis C virus subtype 1b	Trypsin-like serine proteases	8.9
202	B2Y2M9	Genome polyprotein	Hepacivirus C	Trypsin-like serine proteases	8.9
203	A0A140DLX4	Genome polyprotein	Zika virus (ZIKV)	NA	8.8
204	P12823	Genome polyprotein [Cleaved into: Capsid protein C	Dengue virus type 2 (strain Puerto Rico/PR159-S1/1969) (DENV-2)	NN	8.8
205	A1Z093	Genome polyprotein	Hepacivirus C	Trypsin-like serine proteases	8.8
206	O68900	Serine protease pet autotransporter	Escherichia coli O44:H18 (strain 042 / EAEC)	Trypsin-like serine proteases	8.8
207	Q81817	Genome polyprotein	Hepatitis C virus genotype 2	Trypsin-like serine proteases	8.8
208	A6N4I5	Non-structural 3 protease	Hepatitis C virus subtype 1b	NA	8.7
209	Q91RS4	NS3 protease	Hepacivirus C	Trypsin-like serine proteases	8.7
210	Q9ELS8	Genome polyprotein	Hepatitis C virus subtype 1a	Trypsin-like serine proteases	8.7
211	Q9WMX2	Genome polyprotein	Hepatitis C virus genotype 1b (isolate Con1) (HCV)	Trypsin-like serine proteases	8.7
212	Q0ZNA6	NS3 protease	Hepacivirus C	Trypsin-like serine proteases	8.6
213	C1KHN2	NS3 protease	Hepacivirus C	Trypsin-like serine proteases	8.6
214	A8DG50	Genome polyprotein	Hepatitis C virus subtype 1a	Trypsin-like serine proteases	8.3
215	R9TEU1	Genome polyprotein	Hepacivirus C	NA	8.2
216	Q99AU2	Genome polyprotein	Hepatitis C virus subtype 1b	Trypsin-like serine proteases	8.2
217	A0A0B4WYC6	NS3 protease	Hepacivirus C	Trypsin-like serine proteases	8
218	O90417	Genome polyprotein	Japanese encephalitis virus	Trypsin-like serine proteases	8
219	S4UY05	Genome polyprotein	Hepatitis C virus subtype 1a	NA	7.9
220	C1KIK8	NS3 protease	Hepacivirus C	Trypsin-like serine proteases	7.9
221	X2G809	NS3 protein	Hepacivirus C	Trypsin-like serine proteases	7.9
222	P44969	Immunoglobulin A1 protease autotransporter	Haemophilus influenzae (strain ATCC 51907 / DSM 11121 / KW20 / Rd)	NN	7.8
223	P45387	Adhesion and penetration protein autotransporter	Haemophilus influenzae	NN	7.8
224	P19712	Genome polyprotein	Classical swine fever virus (strain Alfort) (CSFV) (Hog cholera virus)	NA	7.7
225	Q8VSL2	Serine protease SepA autotransporter	Shigella flexneri	NA	7.7
226	Q5U8X5	Genome polyprotein	Classical swine fever virus	NA	7.4
227	Q7BSW5	Serine protease EspP	Escherichia coli O157:H7	NN	7.3
228	Q9GRW0	Phenoloxidase-activating factor 2	Holotrichia diomphalia (Korean black chafer)	Trypsin-like serine proteases	7.2
229	P14337	Genome polyprotein	Dengue virus type 2 (isolate Thailand/0168/1979) (DENV-2)	NA	6
230	P07338	Chymotrypsinogen B	Rattus norvegicus (Rat)	Trypsin-like serine proteases	5.3

## Sheet: Table_S1c
Table S1c: List of local structural (binding site) neighbours of Mpro obtained from ProBis search
Sl. No.	UniProt ID	PDB ID	Chain ID
1	P0C6U8	4mds	A
2	P0C6T4	2yna	A
3	P0C6X7	3ebn	A
4	W6A941	4wme	A
5	P0C6Y3	2q6f	A
6	Q0ZJJ1	3d23	A
7	P0C6U6	3tlo	A
8	P0C6U2	2zu2	A
9	P0C6Y5	1lvo	A
10	Q07889	1dbh; 1xd4	A; A
11	P03180	1vlk	A
12	Q5NU42	3wj1	A
13	O57847	2yzi	A
14	O26010	3nv7	A
15	Q47KX2	2qe6	A
16	Q79PF4	4tl6	A
17	P09788	1wvf	A
18	Q83EM7	4f3r	A
19	A8E6E2	3piw	A
20	Q5LU41	3eus	A
21	Q9Y222	2llk	A
22	Q5JE32	4qiw	B
23	B9DUT7	4lfg	A
24	Q52VH2	3n2w	A
25	Q8A4T4	3cuc	A
26	Q8L3C7	2e1m	B
27	Q035U5	2i8d	A
28	P9WPA5	3rba	A
29	Q8WU08	4fr4	A
30	Q386Q8	4bqh	A
31	Q9HLD9	1pvm	A
32	P50384	1o17	A
33	Q9RTQ1	3cnh	A
34	Q6NAM1	3r41	A
35	Q12929	2e8m	A
36	Q5L9C9	3eof	A
37	P00974	1bpi	A
38	P06614	4lon	B
39	O07513	1y23	A
40	A0R4P1	4kzp	A
41	C5EE96	4olo	A
42	Q0VIP6	2ptg	A
43	Q9LCC8	2drw	A
44	Q15370	4b9k; 4ajy	A; B
45	Q13164	4ic7	A
46	Q9EQZ6	4f7z	A
47	Q87UR7	2eve	A
48	Q9WZK0	1vlh	A
49	Q9RS86	2jh3	A
50	Q04815	3l9v	A
51	Q8IV48	4qoz	B
52	A0JD37	1tvd	A
53	P0A9N4	3c8f	A
54	Q1GBW8	2htd	A
55	Q81WF6	3m3h	A
56	G0SAR7	4wpx	A
57	P14611	4o9a	A
58	Q0P891	3kwo	A
59	O82777	3i6s	A
60	Q6CTI2	2yfv	A
61	A0R2B1	2yic	A
62	O76463	1ems	A
63	Q9H2K2	3twr	A
64	P22812	1d2z	B
65	Q57594	1yf2	A
66	P49638	1r5l	A
67	Q96PX8	4rca	B
68	O76283	2x0s	A
69	Q9P1W8	2jjw; 4i2x	A; E
70	P18893	4x51	A
71	P00459	4wza	E
72	Q9ALM5	3slk	A
73	Q63JW5	4byz	A
74	Q939N5	3qc5	X
75	P44308	1lw7	A
76	A8LP63	4kuk	A
77	Q14008	4qmi	A
78	P96726	1rli	A
79	Q5SJQ7	2dt8	A
80	Q9RW55	4h6q	A
81	P19623	2o07	A
82	Q12HR3	3dde	A
83	P29317	2kso; 3kka	A; C
84	P03313	4wfx	A
85	Q6NAE3	3ivr	A
86	O30126	2du3	A
87	A8B1V5	3meb	A
88	P53396	3mwd	B
89	P48499	2vxn	A
90	P22643	1b6g	A
91	P52003	3ech	A
92	O28274	3ngw	A
93	Q3JRK4	3slg	A
94	A3QJE4	2gpi	A
95	Q81UT7	3c5p	A
96	Q2YRE0	3doc	A
97	Q8KND7	3oti	A
98	Q7Z4M2	2gsb	A
99	A7U483	4r21	A
100	Q9DAR7	1vlr	A
101	A0A0H3JPI4	4lqe	A
102	P11938	4gfb	A
103	A0QYB5	4rsm	A
104	P65556	2fkb	A
105	Q8CK21	3bni	A
106	Q0SDB1	4u5r	A
107	Q9V6K1	3lxu	X
108	P23615	3psi	A
109	O27798	1ltl	A
110	Q8BWP5	3w68	A
111	P65938	1z9d	A
112	P24733	1wdc	C
113	P49960	2go9	A
114	A0A0H3K9Z0	4tv5	A
115	Q81TP0	4egb	A
116	Q72IB8	2ekg	A
117	P05113	1hul	A
118	B3TMR1	3m9v	A
119	Q5KXG9	3gr7	A
120	P00169	2m33	A
121	P0A9B2	1gad	O
122	O35973	4dj2	A
123	P52708	1gxs	A
124	Q72H91	1vz0	A
125	Q06623	3hgt	A
126	Q1RMX3	4k5b	A
127	P13981	2a9g	A
128	P47900	4xnv	A
129	Q87W03	3gn3	A
130	Q0ZCI9	3eyq	D
131	P04626	4hrl	A
132	Q8TZS3	3lrx	A
133	Q9KVD5	3n2l	A
134	Q9P212	2c5l	C
135	Q9EYX5	3nvo	A
136	P11859	2wxy	C
137	Q5NIQ1	4eei	A
138	Q82122	1xr7	A
139	Q96KC8	2cqq	A
140	P32684	2gml	A
141	B4EZ68	4od7	A
142	Q5SI56	2dkj	A
143	P26093	3ocu	A
144	P18564	4um9	B
145	Q9UXG1	4r7y	A
146	O28603	1jnr	A
147	P05725	1t9i	A
148	K0V1M6	4xij	A
149	P17618	2b3z	A
150	O95750	2p23	A
151	Q4FU81	2pn2	A
152	P52197	1e0c	A
153	Q5ZYH9	4r0g	A
154	P31371	1ihk	A
155	Q02MM2	2xlk	A
156	P09546	2gpe; 2ay0	A; A
157	A8W3P3	2lht	A
158	Q6PN23	4iv1	B
159	Q96Y20	2ef7	A
160	Q80J95	3uqs	A
161	O29917	3zvs	A
162	Q2GKM8	3k31	A
163	P00579	4xsx	F
164	Q8ZJN9	3l92	A
165	Q9BSQ5	4wj7	A
166	Q9SSK9	2i9y	A
167	Q57695	2yxg	A
168	P52179	2y25	A
169	P15034	2v3z	A
170	P63284	1khy	A
171	B3DH80	4r1z	A
172	P0A951	4r9m	A
173	P37945	1x37	A
174	Q81ST7	3mbo	A
175	P75931	1tlt	A
176	P57105	2jik	A
177	O34678	3b3d	A
178	C5CFI0	3mwc	A
179	F9USZ1	3dhu	A
180	A0A0H2US72	3fb9	A
181	Q7CL96	1yy7	A
182	O00429	4bej	A
183	P0A7B5	2w21	A
184	Q8A5G8	3qnm	A
185	P39787	2v79	A
186	P00807	1ghp	A

## Sheet: Table_S1d
Table S1d: Details of local structural (binding site) neighbours of Mpro obtained from ProBis
[A] Sl.No	[B] UniProt_ID	[C] Protein name	[D] Organism	[E] SCOPe Fold/ CATH Superfamily	[F] ProBis_Z-score
1	P0C6U8	3C-LIKE PROTEINASE	Human SARS coronavirus (SARS-CoV) (Severe acute respiratory syndrome coronavirus)	Trypsin-like serine proteases	4.33
2	P0C6T4	3C-LIKE PROTEINASE	Bat coronavirus HKU4 (BtCoV) (BtCoV/HKU4/2004)	Trypsin-like serine proteases	4.11
3	P0C6X7	REPLICASE POLYPROTEIN 1AB	Human SARS coronavirus (SARS-CoV) (Severe acute respiratory syndrome coronavirus)	main proteinase (3clpro) structure, domain 3	4
4	W6A941	MERS-COV 3CL PROTEASE	Middle East respiratory syndrome-related coronavirus	Trypsin-like serine proteases	3.98
5	P0C6Y3	INFECTIOUS BRONCHITIS VIRUS (IBV) MAIN PROTEASE	Avian infectious bronchitis virus (strain M41) (IBV)	Trypsin-like serine proteases	3.67
6	Q0ZJJ1	3C-LIKE PROTEINASE	Human coronavirus HKU1 (HCoV-HKU1)	NA	3.48
7	P0C6U6	3C-LIKE PROTEINASE	Human coronavirus NL63 (HCoV-NL63)	Trypsin-like serine proteases	3.39
8	P0C6U2	3C-LIKE PROTEINASE	Human coronavirus 229E (HCoV-229E)	Trypsin-like serine proteases	3.24
9	P0C6Y5	REPLICASE, HYDROLASE DOMAIN	Porcine transmissible gastroenteritis coronavirus (strain Purdue) (TGEV)	main proteinase (3clpro) structure, domain 3	2.78
10	Q07889	PROTEIN (HUMAN SOS 1)	Homo sapiens (Human)	Ras GEF	1.73
11	P03180	VIRAL INTERLEUKIN-10	Epstein-Barr virus (strain B95-8) (HHV-4) (Human herpesvirus 4)	BPTI-like	1.68
12	Q5NU42	CARBOXYLESTERASE	Saccharolobus shibatae (Sulfolobus shibatae)	alpha/beta-Hydrolases	1.67
13	O57847	HYPOTHETICAL PROTEIN PH0107	Pyrococcus horikoshii (strain ATCC 700860 / DSM 12428 / JCM 9974 / NBRC 100139 / OT-3)	CBS-domain pair	1.66
14	O26010	PHOSPHOPANTETHEINE ADENYLYLTRANSFERASE	Helicobacter pylori (strain ATCC 700392 / 26695) (Campylobacter pylori)	Adenine nucleotide alpha hydrolase-like	1.6
15	Q47KX2	UNCHARACTERIZED PROTEIN TFU_2867	Thermobifida fusca (strain YX)	Vaccinia Virus protein VP39	1.59
16	P09788	4-CRESOL DEHYDROGENASE [HYDROXYLATING] FLAVOPROTEIN SUBUNIT	Pseudomonas putida (Arthrobacter siderocapsulatus)	FAD-binding/transporter-associated domain-like	1.58
17	Q79PF4	CIRCADIAN CLOCK PROTEIN KINASE KAIC	Synechococcus elongatus (strain PCC 7942) (Anacystis nidulans R2)	P-loop containing nucleotide triphosphate hydrolases	1.58
18	Q83EM7	PHOSPHOPANTETHEINE ADENYLYLTRANSFERASE	Coxiella burnetii (strain RSA 493 / Nine Mile phase I)	Adenine nucleotide alpha hydrolase-like	1.56
19	A8E6E2	TYPE I INTERFERON 2	Danio rerio (Zebrafish) (Brachydanio rerio)	4-helical cytokines	1.54
20	Q5LU41	DNA-BINDING PROTEIN	Ruegeria pomeroyi (strain ATCC 700808 / DSM 15171 / DSS-3) (Silicibacter pomeroyi)	lambda repressor-like DNA-binding domains	1.52
21	Q9Y222	CYCLIN-D-BINDING MYB-LIKE TRANSCRIPTION FACTOR 1	Homo sapiens (Human)	Homeodomain-like	1.49
22	Q5JE32	DNA-DIRECTED RNA POLYMERASE	Thermococcus kodakarensis (strain ATCC BAA-918 / JCM 12380 / KOD1) (Pyrococcus kodakaraensis (strain KOD1))	CATH superfamily 3.90.1070.20	1.45
23	B9DUT7	GERANYLGERANYL DIPHOSPHATE SYNTHASE	Streptococcus uberis (strain ATCC BAA-854 / 0140J)	Terpenoid synthases	1.44
24	Q52VH2	BETA-PEPTIDYL AMINOPEPTIDASE	Sphingosinicella xenopeptidilytica	DmpA/ArgJ-like	1.43
25	Q8A4T4	PROTEIN OF UNKNOWN FUNCTION WITH A FIC DOMAIN	Bacteroides thetaiotaomicron (strain ATCC 29148 / DSM 2079 / NCTC 10582 / E50 / VPI-5482)	Fido-like domain	1.42
26	Q8L3C7	L-GLUTAMATE OXIDASE	Streptomyces sp. X-119-6	NN	1.41
27	P9WPA5	PHOSPHOPANTETHEINE ADENYLYLTRANSFERASE	Mycobacterium tuberculosis (strain ATCC 25618 / H37Rv)	Adenine nucleotide alpha hydrolase-like	1.4
28	Q035U5	UNCHARACTERIZED CONSERVED PROTEIN OF COG5646	Lactobacillus paracasei (strain ATCC 334 / BCRC 17002 / CIP 107868 / KCTC 3260 / NRRL B-441)	Secretion chaperone-like	1.4
29	Q8WU08	SERINE/THREONINE-PROTEIN KINASE 32A	Homo sapiens (Human)	Transferase(Phosphotransferase) domain 1	1.4
30	P50384	ANTHRANILATE PHOSPHORIBOSYLTRANSFERASE	Saccharolobus solfataricus (strain ATCC 35092 / DSM 1617 / JCM 11322 / P2) (Sulfolobus solfataricus)	Methionine synthase domain-like	1.39
31	Q386Q8	UDP-N-ACETYLGLUCOSAMINE PYROPHOSPHORYLASE	Trypanosoma brucei brucei (strain 927/4 GUTat10.1)	Spore Coat Polysaccharide Biosynthesis Protein SpsA; Chain A	1.39
32	Q9HLD9	CONSERVED HYPOTHETICAL PROTEIN TA0289	Thermoplasma acidophilum (strain ATCC 25905 / DSM 1728 / JCM 9062 / NBRC 15155 / AMRC-C165)	CBS-domain pair	1.39
33	Q6NAM1	FLUOROACETATE DEHALOGENASE	Rhodopseudomonas palustris (strain ATCC BAA-98 / CGA009)	alpha/beta-Hydrolases	1.38
34	Q9RTQ1	HYDROLASE FAMILY PROTEIN	Deinococcus radiodurans (strain ATCC 13939 / DSM 20539 / JCM 16871 / LMG 4051 / NBRC 15346 / NCIMB 9279 / R1 / VKM B-1422)	Putative phosphatase; domain 2	1.38
35	Q12929	EPIDERMAL GROWTH FACTOR RECEPTOR KINASE SUBSTRATE 8	Homo sapiens (Human)	Transcription Factor, Ets-1	1.37
36	P00974	BOVINE PANCREATIC TRYPSIN INHIBITOR	Bos taurus (Bovine)	beta-lactamase/transpeptidase-like	1.36
37	Q5L9C9	PUTATIVE OXIDOREDUCTASE	Bacteroides fragilis (strain ATCC 25285 / DSM 2151 / JCM 11019 / NCTC 9343)	FMN-dependent nitroreductase-like	1.36
38	A0R4P1	OXIDOREDUCTASE, SHORT CHAIN DEHYDROGENASE/REDUCTASE FAMILY PROTEIN	Mycolicibacterium smegmatis (strain ATCC 700084 / mc(2)155) (Mycobacterium smegmatis)	NAD(P)-binding Rossmann-like Domain	1.35
39	C5EE96	BMC DOMAIN PROTEIN	Clostridiales bacterium 1_7_47FAA	NN	1.35
40	O07513	HISTIDINE TRIAD PROTEIN	Bacillus subtilis (strain 168)	HIT-like	1.35
41	P06614	HTH-TYPE TRANSCRIPTIONAL REGULATOR CYSB	Salmonella typhimurium (strain LT2 / SGSC1412 / ATCC 700720)	Periplasmic binding protein-like II	1.35
42	Q0VIP6	ENOYL-ACYL CARRIER REDUCTASE	Eimeria tenella (Coccidian parasite)	NAD(P)-binding Rossmann-fold domains	1.34
43	Q9LCC8	D-AMINO ACID AMIDASE	Ochrobactrum anthropi	beta-lactamase/transpeptidase-like	1.34
44	Q15370	TRANSCRIPTION ELONGATION FACTOR B POLYPEPTIDE 2	Homo sapiens (Human)	beta-Grasp (ubiquitin-like)	1.33
45	Q13164	MITOGEN-ACTIVATED PROTEIN KINASE 7	Homo sapiens (Human)	Protein kinase-like (PK-like)	1.32
46	Q9EQZ6	RAP GUANINE NUCLEOTIDE EXCHANGE FACTOR 4	Mus musculus (Mouse)	Winged helix-like DNA-binding domain superfamily/Winged helix DNA-binding domain	1.32
47	Q87UR7	HYPOTHETICAL PROTEIN PSPTO5229	Pseudomonas syringae pv. tomato (strain ATCC BAA-871 / DC3000)	PUA domain-like	1.31
48	Q9RS86	RIBOSOMAL PROTEIN S2-RELATED PROTEIN	Deinococcus radiodurans (strain ATCC 13939 / DSM 20539 / JCM 16871 / LMG 4051 / NBRC 15346 / NCIMB 9279 / R1 / VKM B-1422)	NN	1.31
49	Q9WZK0	PHOSPHOPANTETHEINE ADENYLYLTRANSFERASE	Thermotoga maritima (strain ATCC 43589 / MSB8 / DSM 3109 / JCM 10099)	Adenine nucleotide alpha hydrolase-like	1.31
50	Q04815	PUTATIVE THIOL-DISULFIDE ISOMERASE OR THIOREDOXIN	Salmonella typhimurium	Thioredoxin-like	1.3
51	A0JD37	T CELL RECEPTOR	Homo sapiens (Human)	Immunoglobulin-like beta-sandwich	1.28
52	Q8IV48	3'-5' EXORIBONUCLEASE 1	Homo sapiens (Human)	Ribonuclease H-like superfamily/Ribonuclease H	1.28
53	P0A9N4	PYRUVATE FORMATE-LYASE 1-ACTIVATING ENZYME	Escherichia coli (strain K12)	Aldolase class I	1.27
54	G0SAR7	CELL DIVISION CONTROL PROTEIN 31-LIKE PROTEIN	Chaetomium thermophilum (strain DSM 1495 / CBS 144.50 / IMI 039719)	NA	1.26
55	P14611	ACETYL-COA ACETYLTRANSFERASE	Cupriavidus necator (strain ATCC 17699 / H16 / DSM 428 / Stanier 337) (Ralstonia eutropha)	Thiolase-like	1.26
56	Q1GBW8	PREDICTED FLAVIN-NUCLEOTIDE-BINDING PROTEIN FROM COG3576 FAMILY STRUCTURALLY RELATED TO PYRIDOXINE 5'-PHOSPHATE OXIDASE	Lactobacillus delbrueckii subsp. bulgaricus (strain ATCC 11842 / DSM 20081 / JCM 1002 / NBRC 13953 / NCIMB 11778)	Electron Transport, Fmn-binding Protein; Chain A	1.26
57	Q81WF6	OROTATE PHOSPHORIBOSYLTRANSFERASE	Bacillus anthracis	PRTase-like	1.26
58	O82777	SUBTILISIN-LIKE PROTEASE	Solanum lycopersicum (Tomato) (Lycopersicon esculentum)	Phosphohistidine domain	1.25
59	Q0P891	PUTATIVE BACTERIOFERRITIN	Campylobacter jejuni subsp. jejuni serotype O:2 (strain ATCC 700819 / NCTC 11168)	Ferritin-like	1.25
60	Q6CTI2	HISTONE H3-LIKE CENTROMERIC PROTEIN CSE4	Kluyveromyces lactis (strain ATCC 8585 / CBS 2359 / DSM 70799 / NBRC 1267 / NRRL Y-1140 / WM37) (Yeast) (Candida sphaerica)	Histone-fold	1.25
61	A0R2B1	2-OXOGLUTARATE DECARBOXYLASE	Mycolicibacterium smegmatis (strain ATCC 700084 / mc(2)155) (Mycobacterium smegmatis)	TPP helical domain	1.24
62	O76463	NIT-FRAGILE HISTIDINE TRIAD FUSION PROTEIN	Caenorhabditis elegans	HIT-like	1.24
63	P22812	DEATH DOMAIN OF TUBE	Drosophila melanogaster (Fruit fly)	DEATH domain	1.24
64	Q57594	TYPE I RESTRICTION-MODIFICATION ENZYME, S SUBUNIT	Methanocaldococcus jannaschii (strain ATCC 43067 / DSM 2661 / JAL-1 / JCM 10045 / NBRC 100440) (Methanococcus jannaschii)	DNA methylase specificity domain	1.24
65	Q9H2K2	TANKYRASE-2	Homo sapiens (Human)	beta-hairpin-alpha-hairpin repeat	1.24
66	P49638	PROTEIN (ALPHA-TOCOPHEROL TRANSFER PROTEIN)	Homo sapiens (Human)	RuvA C-terminal domain-like	1.23
67	Q96PX8	SLIT AND NTRK-LIKE PROTEIN 1	Homo sapiens (Human)	Leucine-rich repeat, LRR	1.23
68	O76283	PYRUVATE PHOSPHATE DIKINASE	Trypanosoma brucei	TIM beta/alpha-barrel	1.22
69	P00459	NITROGENASE IRON PROTEIN 1	Azotobacter vinelandii	NA	1.22
70	P18893	INTERLEUKIN-10	Mus musculus (Mouse)	S-adenosyl-L-methionine-dependent methyltransferases	1.22
71	Q9P1W8	SIGNAL REGULATORY PROTEIN GAMMA	Homo sapiens (Human)	Immunoglobulin-like beta-sandwich	1.22
72	Q9ALM5	POLYKETIDE SYNTHASE EXTENDER MODULE 2	Saccharopolyspora spinosa	NAD(P)-binding Rossmann-like Domain	1.21
73	A8LP63	BLUE-LIGHT PHOTORECEPTOR	Dinoroseobacter shibae (strain DSM 16493 / NCIMB 14021 / DFL 12)	Profilin-like	1.2
74	P44308	TRANSCRIPTIONAL REGULATOR NADR	Haemophilus influenzae (strain ATCC 51907 / DSM 11121 / KW20 / Rd)	Adenine nucleotide alpha hydrolase-like	1.2
75	P96726	TRP REPRESSOR BINDING PROTEIN	Bacillus subtilis (strain 168)	Flavodoxin-like	1.2
76	Q14008	CYTOSKELETON-ASSOCIATED PROTEIN 5	Homo sapiens (Human)	Leucine-rich Repeat Variant	1.2
77	Q63JW5	TYPE IV PILUS BIOSYNTHESIS PROTEIN	Burkholderia pseudomallei (strain K96243)	NA	1.2
78	Q939N5	PLATELET BINDING PROTEIN GSPB	Streptococcus gordonii	NN	1.2
79	P19623	SPERMIDINE SYNTHASE	Homo sapiens (Human)	SH2-like	1.19
80	Q5SJQ7	DEGV FAMILY PROTEIN	Thermus thermophilus (strain HB8 / ATCC 27634 / DSM 579)	DAK1/DegV-like	1.19
81	Q9RW55	PROLINE DEHYDROGENASE	Deinococcus radiodurans (strain ATCC 13939 / DSM 20539 / JCM 16871 / LMG 4051 / NBRC 15346 / NCIMB 9279 / R1 / VKM B-1422)	NN	1.19
82	P03313	RNA-DIRECTED RNA POLYMERASE	Coxsackievirus B3 (strain Nancy)	4-helical cytokines	1.18
83	P29317	EPHRIN TYPE-A RECEPTOR 2	Homo sapiens (Human)	SAM domain-like	1.18
84	Q12HR3	TENA/THI-4 PROTEIN, DOMAIN OF UNKNOWN FUNCTION WITH A HEME OXYGENASE-LIKE FOLD	Shewanella denitrificans (strain OS217 / ATCC BAA-1090 / DSM 15013)	Heme oxygenase-like	1.18
85	Q6NAE3	PUTATIVE LONG-CHAIN-FATTY-ACID COA LIGASE	Rhodopseudomonas palustris (strain ATCC BAA-98 / CGA009)	Acetyl-CoA synthetase-like	1.18
86	A8B1V5	ASPARTATE AMINOTRANSFERASE	Giardia intestinalis (strain ATCC 50803 / WB clone C6) (Giardia lamblia)	PLP-dependent transferase-like	1.17
87	O30126	O-PHOSPHOSERYL-TRNA SYNTHETASE	Archaeoglobus fulgidus (strain ATCC 49558 / VC-16 / DSM 4304 / JCM 9628 / NBRC 100126)	NN	1.17
88	P53396	ATP-CITRATE SYNTHASE	Homo sapiens (Human)	Succinyl-CoA synthetase domains	1.17
89	P22643	HALOALKANE DEHALOGENASE	Xanthobacter autotrophicus	alpha/beta-Hydrolases	1.16
90	P48499	TRIOSEPHOSPHATE ISOMERASE	Leishmania mexicana	TIM beta/alpha-barrel	1.16
91	P52003	MULTIDRUG RESISTANCE OPERON REPRESSOR	Pseudomonas aeruginosa (strain ATCC 15692 / DSM 22644 / CIP 104116 / JCM 14847 / LMG 12228 / 1C / PRS 101 / PAO1)	DNA/RNA-binding 3-helical bundle	1.16
92	A3QJE4	CONSERVED HYPOTHETICAL PROTEIN	Shewanella loihica (strain ATCC BAA-1088 / PV-4)	Shew3726-like	1.15
93	O28274	MOLYBDOPTERIN-GUANINE DINUCLEOTIDE BIOSYNTHESIS PROTEIN A (MOBA)	Archaeoglobus fulgidus (strain ATCC 49558 / VC-16 / DSM 4304 / JCM 9628 / NBRC 100126)	Spore Coat Polysaccharide Biosynthesis Protein SpsA; Chain A	1.15
94	Q3JRK4	PBGP3 PROTEIN	Burkholderia pseudomallei (strain 1710b)	NAD(P)-binding Rossmann-fold domains	1.15
95	Q81UT7	PROTEIN BAS0735 OF UNKNOWN FUNCTION	Bacillus anthracis	NA	1.15
96	A7U483	CYTOCHROME P450 FAMILY 17 POLYPEPTIDE 2	Danio rerio (Zebrafish) (Brachydanio rerio)	Cytochrome P450	1.14
97	Q2YRE0	GLYCERALDEHYDE 3-PHOSPHATE DEHYDROGENASE	Brucella abortus (strain 2308)	Dihydrodipicolinate Reductase; domain 2	1.14
98	Q7Z4M2	RAS GTPASE-ACTIVATING PROTEIN 1	Homo sapiens (Human)	NA	1.14
99	Q8KND7	CALG3	Micromonospora echinospora (Micromonospora purpurea)	UDP-Glycosyltransferase/glycogen phosphorylase	1.14
100	Q9DAR7	MRNA DECAPPING ENZYME	Mus musculus (Mouse)	HIT-like	1.14
101	A0A0H3JPI4	MEPB	Staphylococcus aureus (strain Mu50 / ATCC 700699)	NN	1.13
102	P11938	DNA-BINDING PROTEIN RAP1	Saccharomyces cerevisiae (strain ATCC 204508 / S288c) (Baker's yeast)	Homeodomain-like	1.13
103	A0QYB5	PERIPLASMIC BINDING PROTEIN/LACI TRANSCRIPTIONAL REGULATOR	Mycolicibacterium smegmatis (strain ATCC 700084 / mc(2)155) (Mycobacterium smegmatis)	NA	1.12
104	P65556	PUTATIVE NUDIX HYDROLASE YFCD	Escherichia coli (strain K12)	Nudix	1.12
105	Q0SDB1	RHCC	Rhodococcus jostii (strain RHA1)	Macrophage Migration Inhibitory Factor	1.12
106	Q8CK21	PUTATIVE TETR-FAMILY TRANSCRIPTIONAL REGULATOR	Streptomyces coelicolor (strain ATCC BAA-471 / A3(2) / M145)	Human Immunodeficiency Virus Type 1 Capsid Protein	1.12
107	Q9V6K1	TRIPEPTIDYL-PEPTIDASE 2	Drosophila melanogaster (Fruit fly)	NN	1.12
108	O27798	DNA REPLICATION INITIATOR (CDC21/CDC54)	Methanothermobacter thermautotrophicus (strain ATCC 29096 / DSM 1053 / JCM 10044 / NBRC 100330 / Delta H) (Methanobacterium thermoautotrophicum)	OB-fold	1.11
109	P23615	TRANSCRIPTION ELONGATION FACTOR SPT6	Saccharomyces cerevisiae (strain ATCC 204508 / S288c) (Baker's yeast)	RuvA domain 2-like	1.11
110	P24733	SCALLOP MYOSIN	Argopecten irradians (Bay scallop) (Aequipecten irradians)	Kinesin	1.11
111	P65938	URIDYLATE KINASE	Streptococcus pyogenes serotype M1	Carbamate kinase-like	1.11
112	Q8BWP5	ALPHA-TOCOPHEROL TRANSFER PROTEIN	Mus musculus (Mouse)	RuvA C-terminal domain-like	1.11
113	A0A0H3K9Z0	2-DEHYDRO-3-DEOXYGLUCARATE ALDOLASE	Staphylococcus aureus (strain Newman)	TIM beta/alpha-barrel	1.1
114	P49960	U4/U6 SNRNA-ASSOCIATED SPLICING FACTOR PRP24	Saccharomyces cerevisiae (strain ATCC 204508 / S288c) (Baker's yeast)	Ferredoxin-like	1.1
115	B3TMR1	FAD-DEPENDENT OXIDOREDUCTASE	Actinomadura kijaniata	Acyl-CoA dehydrogenase/oxidase, N-terminal domain	1.09
116	O35973	PERIOD CIRCADIAN PROTEIN HOMOLOG 1	Mus musculus (Mouse)	NN	1.09
117	P00169	CYTOCHROME B5	Oryctolagus cuniculus (Rabbit)	Cytochrome b5-like heme/steroid binding domain	1.09
118	P05113	INTERLEUKIN-5	Homo sapiens (Human)	4-helical cytokines	1.09
119	P0A9B2	D-GLYCERALDEHYDE-3-PHOSPHATE DEHYDROGENASE	Escherichia coli (strain K12)	FwdE/GAPDH domain-like	1.09
120	P52708	P-(S)-HYDROXYMANDELONITRILE LYASE CHAIN A	Sorghum bicolor (Sorghum) (Sorghum vulgare)	alpha/beta-Hydrolases	1.09
121	Q5KXG9	NADPH DEHYDROGENASE	Geobacillus kaustophilus (strain HTA426)	TIM beta/alpha-barrel	1.09
122	Q72IB8	PROLINE DEHYDROGENASE/DELTA-1-PYRROLINE-5-CARBOXYLATE DEHYDROGENASE	Thermus thermophilus (strain HB27 / ATCC BAA-163 / DSM 7039)	NN	1.09
123	Q81TP0	DTDP-GLUCOSE 4,6-DEHYDRATASE	Bacillus anthracis	NAD(P)-binding Rossmann-like Domain	1.09
124	P04626	DESIGNED ANKYRIN REPEAT PROTEIN 9_29	Homo sapiens (Human)	DNA/RNA polymerases	1.08
125	P13981	ARGININE DEIMINASE	Pseudomonas aeruginosa (strain ATCC 15692 / DSM 22644 / CIP 104116 / JCM 14847 / LMG 12228 / 1C / PRS 101 / PAO1)	Pentein, beta/alpha-propeller	1.08
126	P47900	P2Y PURINOCEPTOR 1, RUBREDOXIN, P2Y PURINOCEPTOR 1	Homo sapiens (Human)	NA	1.08
127	Q06623	HDA1 COMPLEX SUBUNIT 3	Saccharomyces cerevisiae (strain ATCC 204508 / S288c) (Baker's yeast)	NN	1.08
128	Q0ZCI9	8F9 FAB	Homo sapiens (Human)	Immunoglobulins	1.08
129	Q1RMX3	APOPTOSIS REGULATOR BCL-W	Bos taurus (Bovine)	Apoptosis Regulator Bcl-x	1.08
130	Q72H91	CHROMOSOME PARTITIONING PROTEIN PARB	Thermus thermophilus (strain HB27 / ATCC BAA-163 / DSM 7039)	DNA/RNA-binding 3-helical bundle	1.08
131	Q87W03	PUTATIVE PROTEIN-DISULFIDE ISOMERASE	Pseudomonas syringae pv. tomato (strain ATCC BAA-871 / DC3000)	Glutaredoxin	1.08
132	Q8TZS3	PUTATIVE HYDROGENASE	Pyrococcus furiosus (strain ATCC 43587 / DSM 3638 / JCM 8422 / Vc1)	Nucleotide-binding domain of ferredoxin-NADP reductase (FNR) module	1.08
133	B4EZ68	THIOL:DISULFIDE INTERCHANGE PROTEIN	Proteus mirabilis (strain HI4320)	Thioredoxin-like	1.07
134	P11859	ANGIOTENSINOGEN	Mus musculus (Mouse)	Alpha-1-antitrypsin, domain 1	1.07
135	P18564	INTEGRIN BETA-6	Homo sapiens (Human)	4-helical cytokines	1.07
136	P26093	LIPOPROTEIN E	Haemophilus influenzae (strain ATCC 51907 / DSM 11121 / KW20 / Rd)	NA	1.07
137	P32684	RIBOSOMAL LARGE SUBUNIT PSEUDOURIDINE SYNTHASE F	Escherichia coli (strain K12)	NN	1.07
138	Q5NIQ1	ADENYLOSUCCINATE LYASE	Francisella tularensis subsp. tularensis (strain SCHU S4 / Schu 4)	L-aspartase-like	1.07
139	Q5SI56	SERINE HYDROXYMETHYLTRANSFERASE	Thermus thermophilus (strain HB8 / ATCC 27634 / DSM 579)	PLP-dependent transferase-like	1.07
140	Q82122	GENOME POLYPROTEIN	Human rhinovirus 16 (HRV-16)	DNA/RNA polymerases	1.07
141	Q96KC8	DNAJ HOMOLOG SUBFAMILY C MEMBER 1	Homo sapiens (Human)	DNA/RNA-binding 3-helical bundle	1.07
142	Q9EYX5	ZINC TRANSPORT PROTEIN ZNTB	Salmonella typhimurium (strain LT2 / SGSC1412 / ATCC 700720)	Magnesium transport protein CorA, transmembrane region	1.07
143	Q9KVD5	OROTATE PHOSPHORIBOSYLTRANSFERASE	Vibrio cholerae serotype O1 (strain ATCC 39315 / El Tor Inaba N16961)	PRTase-like	1.07
144	Q9P212	PHOSPHOINOSITIDE-SPECIFIC PHOSPHOLIPASE C PLC-EPSILON	Homo sapiens (Human)	beta-Grasp (ubiquitin-like)	1.07
145	O28603	ADENYLYLSULFATE REDUCTASE	Archaeoglobus fulgidus (strain ATCC 49558 / VC-16 / DSM 4304 / JCM 9628 / NBRC 100126)	Spectrin repeat-like	1.06
146	P05725	DNA ENDONUCLEASE I-CREI	Chlamydomonas reinhardtii (Chlamydomonas smithii)	Homing endonuclease-like	1.06
147	Q9UXG1	MINICHROMOSOME MAINTENANCE PROTEIN MCM, CELL DIVISION CONTROL PROTEIN 21	Saccharolobus solfataricus (strain ATCC 35092 / DSM 1617 / JCM 11322 / P2) (Sulfolobus solfataricus)	NA	1.06
148	K0V1M6	SHIKIMATE 5-DEHYDROGENASE	Mycolicibacterium fortuitum subsp. fortuitum DSM 46621 = ATCC 6841	NAD(P)-binding Rossmann-like Domain	1.05
149	O95750	FIBROBLAST GROWTH FACTOR 19	Homo sapiens (Human)	beta-Trefoil	1.05
150	P09546	BIFUNCTIONAL PROTEIN PUTA	Escherichia coli (strain K12)	Ribbon-helix-helix	1.05
151	P17618	RIBOFLAVIN BIOSYNTHESIS PROTEIN RIBD	Bacillus subtilis (strain 168)	Dihydrofolate reductase-like	1.05
152	P31371	GLIA-ACTIVATING FACTOR	Homo sapiens (Human)	beta-Trefoil	1.05
153	P52197	SULFURTRANSFERASE	Azotobacter vinelandii	Rhodanese/Cell cycle control phosphatase	1.05
154	Q02MM2	CSY4 ENDORIBONUCLEASE	Pseudomonas aeruginosa (strain UCBPP-PA14)	NN	1.05
155	Q4FU81	UNCHARACTERIZED PROTEIN	Psychrobacter arcticus (strain DSM 17307 / 273-4)	OsmC-like	1.05
156	Q5ZYH9	UNCHARACTERIZED PROTEIN	Legionella pneumophila subsp. pneumophila (strain Philadelphia 1 / ATCC 33152 / DSM 7513)	NA	1.05
157	A8W3P3	CELLOPHANE-INDUCED PROTEIN 1	Venturia inaequalis (Apple scab fungus)	NA	1.04
158	O29917	ARCHAEMETZINCIN	Archaeoglobus fulgidus (strain ATCC 49558 / VC-16 / DSM 4304 / JCM 9628 / NBRC 100126)	Collagenase (Catalytic Domain)	1.04
159	P00579	RNA POLYMERASE SIGMA FACTOR RPOD	Escherichia coli (strain K12)	P-loop containing nucleoside triphosphate hydrolases	1.04
160	Q2GKM8	ENOYL-(ACYL-CARRIER-PROTEIN) REDUCTASE	Anaplasma phagocytophilum (strain HZ)	NAD(P)-binding Rossmann-like Domain	1.04
161	Q6PN23	CAPSID PROTEIN VP2	Foot-and-mouth disease virus - type A	Foot-And-Mouth Disease Virus, subunit 4	1.04
162	Q80J95	RNA-DEPENDENT RNA POLYMERASE	Murine norovirus 1	DNA/RNA polymerases	1.04
163	Q8ZJN9	PHOSPHOPANTETHEINE ADENYLYLTRANSFERASE	Yersinia pestis	Adenine nucleotide alpha hydrolase-like	1.04
164	Q96Y20	HYPOTHETICAL PROTEIN ST2348	Sulfurisphaera tokodaii (strain DSM 16993 / JCM 10545 / NBRC 100140 / 7) (Sulfolobus tokodaii)	CBS-domain pair	1.04
165	P15034	XAA-PRO AMINOPEPTIDASE	Escherichia coli (strain K12)	Ribonuclease H-like motif	1.03
166	P52179	MYOMESIN	Homo sapiens (Human)	Immunoglobulins	1.03
167	Q57695	DIHYDRODIPICOLINATE SYNTHASE	Methanocaldococcus jannaschii (strain ATCC 43067 / DSM 2661 / JAL-1 / JCM 10045 / NBRC 100440) (Methanococcus jannaschii)	TIM beta/alpha-barrel	1.03
168	Q9BSQ5	MALCAVERNIN	Homo sapiens (Human)	Pleckstrin-homology domain (PH domain)/Phosphotyrosine-binding domain (PTB)	1.03
169	Q9SSK9	MAJOR LATEX PROTEIN-LIKE PROTEIN 28 OR MLP-LIKE PROTEIN 28	Arabidopsis thaliana (Mouse-ear cress)	NN	1.03
170	B3DH80	CYP17A1 PROTEIN	Danio rerio (Zebrafish) (Brachydanio rerio)	Cytochrome P450	1.02
171	C5CFI0	MANDELATE RACEMASE/MUCONATE LACTONIZING PROTEIN	Kosmotoga olearia (strain ATCC BAA-1733 / DSM 21960 / TBF 19.5.1)	Enolase-like C-terminal domain	1.02
172	O34678	PUTATIVE MORPHINE DEHYDROGENASE	Bacillus subtilis (strain 168)	TIM beta/alpha-barrel	1.02
173	P0A951	SPERMIDINE N(1)-ACETYLTRANSFERASE	Escherichia coli (strain K12)	Acyl-CoA N-acyltransferases	1.02
174	P37945	ATP-DEPENDENT PROTEASE LA 1	Bacillus subtilis (strain 168)	P-loop containing nucleoside triphosphate hydrolases	1.02
175	P57105	SYNAPTOJANIN-2 BINDING PROTEIN	Homo sapiens (Human)	PDZ domain-like	1.02
176	P63284	CLPB PROTEIN	Escherichia coli (strain K12)	Double Clp-N motif	1.02
177	P75931	PUTATIVE OXIDOREDUCTASE (VIRULENCE FACTOR MVIM HOMOLOG)	Escherichia coli (strain K12)	FwdE/GAPDH domain-like	1.02
178	Q81ST7	GLYCOSYLTRANSFERASE, GROUP 1 FAMILY	Bacillus anthracis	NN	1.02
179	A0A0H2US72	UNCHARACTERIZED PROTEIN	Streptococcus pneumoniae serotype 4 (strain ATCC BAA-334 / TIGR4)	NA	1.01
180	F9USZ1	ALPHA-AMYLASE	Lactobacillus plantarum (strain ATCC BAA-793 / NCIMB 8826 / WCFS1)	Golgi alpha-mannosidase II	1.01
181	Q7CL96	STRINGENT STARVATION PROTEIN A	Yersinia pestis	Glutaredoxin	1.01
182	O00429	DYNAMIN 1-LIKE PROTEIN	Homo sapiens (Human)	NN	1
183	P00807	BETA-LACTAMASE	Staphylococcus aureus	Winged helix-like DNA-binding domain superfamily/Winged helix DNA-binding domain	1
184	P0A7B5	GLUTAMATE 5-KINASE	Escherichia coli (strain K12)	Carbamate kinase-like	1
185	P39787	DNA REPLICATION PROTEIN DNAD	Bacillus subtilis (strain 168)	Winged helix-like DNA-binding domain superfamily/Winged helix DNA-binding domain	1
186	Q8A5G8	HALOACID DEHALOGENASE-LIKE HYDROLASE	Bacteroides thetaiotaomicron (strain ATCC 29148 / DSM 2079 / NCTC 10582 / E50 / VPI-5482)	HAD-like	1

## Sheet: INDEX_S2
The next two sheets contain the tables with prefix 'S2' Table S2a contains detailed information of the DrugBank molecules of our interest which are associated with the DALI hits. Table S2b contains the results of docking analysis of the molecules selected from workflow-I The index for TableS2a is given below. Table S2b is self-explanatory
Index to Table S2a
Cloumn	Description	Explanation
(A)	Sl.no.	Serial number
(B)	DrugBank_mol_Name	Self-explanatory; green : compound selected for docking; red font: unlikely to be a good small-molecule drug candidate (N/I);
(C)	DrugBank_ID	Self-explanatory; blue: redundant hit
(D)	Drug_group	Refer text (Materials and Methods); pink: Biotech product/Nutraceutiacal (NOT of interest); red: withdrawn; yellow: investigational but approved in certain countries
(E)	PDBe_Lig_ID (Associated PDB Entries)	Self explanatory; If there are more than 4 PDB entries to which the molecule is bound, then the link to the list of entries is provided
(F)	DB_mol_SMILES/Peptide_sequence	SMILES code for small molecule is provided; for biotech products (like recombinant proteins): aminno acid sequence is provided (if available)
(G)	Any_other_target (Uniprot ID; Organism)	List of proteins which are listed as target of the corresponding drug apart from the protein picked up as hit in the DALI search
(H)	Sim_of_DB-mol_with_O6K (TC1)	Tanimoto coefficient (TC1) between 'O6K' and the DrugBank molecule
(I)	Sim_of_DB-mol_with_X77 (TC2)	Tanimoto coefficient (TC2) between 'X77' and the DrugBank molecule
(J)	Known_category/description/indication	Known therapeutic usage or any pertinent information as obtained from DrugBank
(K)	Pharmacological_action	Type of modulator (if known): inhibitor/activator etc.
(L)	Remark (DB_mol hits)	Any special observation
(M)	Mapped_target (Uniprot ID; Organism)	Protein target (from our DALI hit) for the corresponding DrugBank molecule; grey: non-human protein; red: human protein
(N)	%identity_with_SARS-CoV-2_main_protease (Q.cov%; E-val)	Percentage identity between the protein mentioned in Column (M) and SARS-Cov-2 main protease (%Query Coverage; E-value): obtained from sequence seaarch using BLASTp server
(O)	Avg. Mol. Wt.	Average Molecular Weight of the DrugBank molecule
The section 'Others' at the end of Table S2a contains the list of proteins which have been obtained as hits in the DALI search and are also associated with at least one DrugBank molecule. However, such molecules are not within the scope of our current study. These are mostly protein-based therapies (biotech products) and are NOT small molecules.
N/A : Not available; ND: not detected as hit in BLAST search; N/I : Not interesting for the current study : as those molecules are unlikely to be good small molecule drug-candidate; N/P: Not Performed

## Sheet: Table_S2a
Table S2a: Details of shortlisted drugs as obtained from workflow-I
(A) Sl.no.	(B) DrugBank_mol_Name	(C) DrugBank_ID	(D) Drug_group	(E) PDBe_Lig_ID (Associated PDB Entries)	(F) DB_mol_SMILES/Peptide_sequence	(G) Any_other_target (Uniprot ID; Organism)	(H) Sim_of_DB-mol_with_O6K (TC1)	(I) Sim_of_DB-mol_with_X77(TC2)	(J) Known_category/description/indication	(K) Pharmacological_action	(L) Remark (DB_mol hits)	(M) Mapped_target (Uniprot ID; Organism) from DALI hit list	(N) %identity_with_SARS-CoV-2_main_protease (Q.cov%; E-val)	(O) Avg. Mol. Wt.
1	benzyl (2-oxopropyl)carbamate	DB07293	Experimental	959 (3D62)	CC(=O)CNC(=O)OCC1=CC=CC=C1	N/A	0.355289	0.351779	N/A	N/A	No known approved molecule of our interest.	Replicase polyprotein 1ab (P0C6X7; Human SARS coronavirus)	96.08 (100; 0)	207.226
2	2-[(2,4-DICHLORO-5-METHYLPHENYL)SULFONYL]-1,3-DINITRO-5-(TRIFLUOROMETHYL)BENZENE	DB07620	Experimental	D3F (2GZ7)	CC1=CC(=C(Cl)C=C1Cl)S(=O)(=O)C1=C(C=C(C=C1[N+]([O-])=O)C(F)(F)F)[N+]([O-])=O	Replicase polyprotein 1a (P0C6U8; SARS-CoV)	0.385003	0.372512	N/A	N/A				459.181
3	S-[5-(TRIFLUOROMETHYL)-4H-1,2,4-TRIAZOL-3-YL] 5-(PHENYLETHYNYL)FURAN-2-CARBOTHIOATE	DB07743	Experimental	F3F (2GZ8)	FC(F)(F)C1=NN=C(N1)SC(=O)C1=CC=C(O1)C#CC1=CC=CC=C1	Replicase polyprotein 1a (P0C6U8; SARS-CoV)	0.306833	0.299935	N/A	N/A				363.314
4	5-amino-2-methyl-N-[(1R)-1-naphthalen-1-ylethyl]benzamide	DB08656	Experimental	TTT (3E9S)	[H][C@](C)(NC(=O)C1=C(C)C=CC(N)=C1)C1=CC=CC2=C1C=CC=C2	fibroblast growth factor 2 (P09038; Homo sapiens); Vascular endothelial growth factor A (P15692; Homo sapiens); Interleukin-8 (P10145; Homo sapiens)	0.453159	0.461874	N/A	N/A				304.386
5	NALPHA-[(BENZYLOXY)CARBONYL]-N-[(1R)-4-HYDROXY-1-METHYL-2-OXOBUTYL]-L-PHENYLALANINAMIDE	DB08732	Experimental	WR1 (2OP9)	[H][C@](C)(NC(=O)[C@]([H])(CC1=CC=CC=C1)NC(=O)OCC1=CC=CC=C1)C(=O)CCO	Replicase polyprotein 1a (P0C6U8; SARS-CoV)	0.310007	0.317227	N/A	N/A				398.452
6	4-(Dimethylamino)benzoic acid	DB08748	Experimental	XP1 (2V6N;2VJ1)	CN(C)C1=CC=C(C=C1)C(O)=O	Orf1a polyprotein (A7J8L3; SARS-CoV)	0.342	0.343936	N/A	N/A				165.189
7	Remdesivir	DB14761	Investigational	N/A	CCC(CC)COC(=O)[C@H](C)N[P@](=O)(OC[C@H]1O[C@](C#N)([C@H](O)[C@@H]1O)C1=CC=C2N1N=CN=C2N)OC1=CC=CC=C1	RNA-directed RNA polymerase L (Q05318; Zaire ebolavirus (strain Mayinga-76))	0.539572	0.530472	Antiviral agents	inhibitor				602.585
8	2-[(2,4-DICHLORO-5-METHYLPHENYL)SULFONYL]-1,3-DINITRO-5-(TRIFLUOROMETHYL)BENZENE	DB07620	Experimental	D3F (2GZ7)	CC1=CC(=C(Cl)C=C1Cl)S(=O)(=O)C1=C(C=C(C=C1[N+]([O-])=O)C(F)(F)F)[N+]([O-])=O	Replicase polyprotein 1ab (P0C6X7; SARS-CoV)	0.385003	0.372512	N/A	N/A	No known approved molecule of our interest.	Replicase polyprotein 1a (P0C6U8; Human SARS coronavirus)	95.75 (100; 0)	459.181
9	S-[5-(TRIFLUOROMETHYL)-4H-1,2,4-TRIAZOL-3-YL] 5-(PHENYLETHYNYL)FURAN-2-CARBOTHIOATE	DB07743	Experimental	F3F (2GZ8)	FC(F)(F)C1=NN=C(N1)SC(=O)C1=CC=C(O1)C#CC1=CC=CC=C1	Replicase polyprotein 1ab (P0C6X7; SARS-CoV)	0.306833	0.299935	N/A	N/A				363.314
10	NALPHA-[(BENZYLOXY)CARBONYL]-N-[(1R)-4-HYDROXY-1-METHYL-2-OXOBUTYL]-L-PHENYLALANINAMIDE	DB08732	Experimental	WR1 (2OP9)	[H][C@](C)(NC(=O)[C@]([H])(CC1=CC=CC=C1)NC(=O)OCC1=CC=CC=C1)C(=O)CCO	Replicase polyprotein 1ab (P0C6X7; SARS-CoV)	0.310007	0.317227	N/A	N/A				398.452
11	4-(Dimethylamino)benzoic acid	DB08748	Experimental	XP1 (2V6N;2VJ1)	CN(C)C1=CC=C(C=C1)C(O)=O	Orf1a polyprotein (A7J8L3; SARS-CoV)	0.342	0.343936	N/A	N/A	No known approved molecule of our interest.	Orf1a polyprotein (A7J8L3; Human SARS coronavirus)	96.04 (99; 0)	165.189
12	Ethyl (4R)-4-{[(2R,5S)-2-(4-fluorobenzyl)-6-methyl-5-{[(5-methyl-1,2-oxazol-3-yl)carbonyl]amino}-4-oxoheptanoyl]amino}-5-[(3S)-2-oxo-3-pyrrolidinyl]pentanoate	DB02313	Experimental	AG7 (10 PDB entries; https://www.ebi.ac.uk/pdbe-srv/pdbechem/PDBEntry/list/AG7)	[H]N([C@H](CCC(=O)OCC)C[C@@H]1CCN([H])C1=O)C(=O)[C@H](CC(=O)[C@@H](N([H])C(=O)C1=NOC(C)=C1)C(C)C)CC1=CC=C(F)C=C1	N/A	0.448684	0.424613	N/A	N/A	No known approved molecule of our interest.	Genome polyprotein (P04936; Human rhinovirus 2)	ND	600.688
13	Lauric acid	DB03017	Approved, Experimental	DAO (71 PDB entries; https://www.ebi.ac.uk/pdbe-srv/pdbechem/PDBEntry/list/DAO)	CCCCCCCCCCCC(O)=O	20 other targets including some human proteins (https://www.drugbank.ca/drugs/DB03017)	0.351562	0.351562	Cleansing agent	N/A	N/I			200.318
14	Tris(Hydroxyethyl)Aminomethane	DB04237	Experimental	TAM (111 PDB entries; https://www.ebi.ac.uk/pdbe-srv/pdbechem/PDBEntry/list/TAM)	NC(CCO)(CCO)CCO	Alpha-amylase 1 (P04745; Homo sapiens); Chlorocatechol 1,2-dioxygenase (O67987;Rhodococcus opacus)	0.375	0.375	N/A	N/A	N/I No known approved molecule of our interest.	Alpha-lytic protease (P00778; Lysobacter enzymogenes)	ND	163.215
15	PHENYLALANINE BORONIC ACID	DB07411	Experimental	B2F (5 PDB entries; https://www.ebi.ac.uk/pdbe-srv/pdbechem/PDBEntry/list/B2F)	[H][C@](N)(CC1=CC=CC=C1)B(O)O	N/A	0.302789	0.312749	N/A	N/A				164.997
16	Amido Phenyl Pyruvic Acid	DB02018	Experimental	APA (1A0I;1AHT;1TPP)	NC(=N)C1=CC=C(CC(=O)C(O)=O)C=C1	N/A	0.452	0.450397	N/A	N/A	No known approved molecule of our interest.	Tryptase beta-2 (P20231; Homo sapiens)	ND	206.198
17	4-PIPERIDIN-4-YLBUTANAL	DB04654	Experimental	C1R (2FWW;2FX4)	O=CCCCC1CCNCC1	Trypsin-1 (P07477, Homo sapiens)	0.333333	0.332031	N/A	N/A				155.237
18	[4-(3-AMINOMETHYL-PHENYL)-PIPERIDIN-1-YL]-(5-PHENETHYL- PYRIDIN-3-YL)-METHANONE	DB04764	Experimental	PM2 (2BM2)	NCC1=CC=CC(=C1)C1CCN(CC1)C(=O)C1=CC(CCC2=CC=CC=C2)=CN=C1	N/A	0.303571	0.355366	N/A	N/A				399.528
19	JNJ-27390467	DB06962	Experimental	2FF (2ZA5)	NCC1=CC=C2OCC3(CCN(CC3)C(=O)C3=CC=C(O3)C#CC3=CC=CC=C3)C2=C1	N/A	0.409371	0.427239	Non-peptide inhibitor of human mast cell tryptase	N/A				412.48
20	Lepirudin	DB00001	Approved	N/A	LVYTDCTESGQNLCLCEGSNVCGQGNKCILGSDGEKNQCVTGEGTPKPQSHNDGDFEEIP EEYLQ	N/A	N/A	N/A	Anticoagulant/Protease Inhibitors	inhibitor	120 molecules are listed in DB against P00734; Approved and/ or Investigational molecules with known type of pharmacological action (='inhibitor') have been mentioned here as these molecules are better candidates for further investigation over the others. Dabigatran etexilate is an oral prodrug that is hydrolyzed to the competitive and reversible direct thrombin inhibitor dabigatranLabel Ximelaga…	Prothrombin (P00734; Homo sapiens)	ND	6963.43
21	Dabigatran etexilate (prodrug)/ Dabigatran (active metabolite)	DB06695/ DB14726	Approved/ Investigational	4CC (dabigatran) (5 PDB entries: https://www.ebi.ac.uk/pdbe-srv/pdbechem/PDBEntry/list/4CC)	Dabigatran: CN1C(CNC2=CC=C(C=C2)C(N)=N)=NC2=C1C=CC(=C2)C(=O)N(CCC(O)=O)C1=NC=CC=C1	N/A	0.44	0.5	Anticoagulant /Protease Inhibitors	inhibitor				627.733
22	Human C1-esterase inhibitor	DB06404	Approved	N/A	N/A	6 other targets including some human proteins (https://www.drugbank.ca/drugs/DB06404)	N/A	N/A	Immunoproteins/Protease Inhibitors	inhibitor				N/A
23	Bivalirudin	DB00006	Approved, Investigational	N/A	CC[C@H](C)[C@H](NC(=O)[C@H](CCC(O)=O)NC(=O)[C@H](CCC(O)=O)NC(=O)[C@H](CC1=CC=CC=C1)NC(=O)[C@H](CC(O)=O)NC(=O)CNC(=O)[C@H](CC(N)=O)NC(=O)CNC(=O)CNC(=O)CNC(=O)CNC(=O)[C@@H]1CCCN1C(=O)[C@H](CCCNC(N)=N)NC(=O)[C@@H]1CCCN1C(=O)[C@H](N)CC1=CC=CC=C1)C(=O)N1CCC[C@H]1C(=O)N[C@@H](CCC(O)=O)C(=O)N[C@@H](CCC(O)=O)C(=O)N[C@@H](CC1=CC=C(O)C=C1)C(=O)N[C@@H](CC(C)C)C(O)=O	N/A	0.436997	0.40352	Anticoagulant /Protease Inhibitors	inhibitor				2180.29
24	Argatroban	DB00278	Approved, Investigational	N/A	C[C@@H]1CCN([C@H](C1)C(O)=O)C(=O)[C@H](CCCNC(N)=N)NS(=O)(=O)C1=CC=CC2=C1NCC(C)C2	N/A	0.49	0.47697	Anticoagulant /Protease Inhibitors	inhibitor				508.64
25	Thrombomodulin Alfa	DB05777	Approved, Investigational	N/A	N/A	Coagulation factor V (P12259;Hoomo sapiens)	N/A	N/A	Platelet Membrane Glycoproteins/Immunologic	inhibitor				N/A
26	Conestat alfa	DB09228	Approved, Investigational	N/A	N/A	6 other human targets (https://www.drugbank.ca/drugs/DB09228)	N/A	N/A	Drugs Used in Hereditary Angioedema/Protease Inhibitors	inhibitor				67000
27	Antithrombin Alfa	DB11166	Approved, Investigational	N/A	N/A	Coagulation factor X (P00742; Homo sapiens)	N/A	N/A	Anticoagulant/Thrombin Inhibitors	inhibitor				N/A
28	Betrixaban	DB12364	Approved, Investigational	N/A	COC1=CC=C(NC(=O)C2=CC=C(C=C2)C(=N)N(C)C)C(=C1)C(=O)NC1=CC=C(Cl)C=N1	N/A	0.350032	0.402658	Anticoagulant /Protease Inhibitors	inhibitor				451.91
29	Ximelagatran	DB04898	Approved, Investigational, withdrawn	N/A	CCOC(=O)CN[C@@H](C(=O)N1CC[C@H]1C(=O)NCC1=CC=C(C=C1)C(\N)=N\O)C1CCCCC1	N/A	0.413043	0.377808	Anticoagulant /Protease Inhibitors	inhibitor				473.565
30	Suramin	DB04786	Investigational	N/A	CC1=C(NC(=O)C2=CC(NC(=O)NC3=CC=CC(=C3)C(=O)NC3=C(C)C=CC(=C3)C(=O)NC3=C4C(C=C(C=C4S(O)(=O)=O)S(O)(=O)=O)=C(C=C3)S(O)(=O)=O)=CC=C2)C=C(C=C1)C(=O)NC1=C2C(C=C(C=C2S(O)(=O)=O)S(O)(=O)=O)=C(C=C1)S(O)(=O)=O	5 other human targets and 1 VACV target (https://www.drugbank.ca/drugs/DB04786)	0.381042	0.416026	Anti-Infective Agents/Antineoplastic Agents	inhibitor				1297.28
31	Gabexate	DB12831	Investigational	N/A	CCOC(=O)C1=CC=C(OC(=O)CCCCCNC(N)=N)C=C1	Plasma kallikrein (Homo sapiens); Plasminogen (Homo sapiens)	0.347299	0.342795	Anticoagulant/Protease Inhibitors	inhibitor				321.377
32	Nafamostat	DB12598	Investigational / Approved in Asian countries	N/A	NC(=N)NC1=CC=C(C=C1)C(=O)OC1=CC2=C(C=C1)C=C(C=C2)C(N)=N	5 other human targets (https://www.drugbank.ca/drugs/DB12598)	0.416122	0.421739	Anticoagulant/Antirheumatic Agents/Protease Inhibitors	inhibitor				347.378
33	Aminocaproic acid	DB00513	Approved, Investigational	ACA (56 PDB entries; https://www.ebi.ac.uk/pdbe-srv/pdbechem/PDBEntry/list/ACA)	NCCCCCC(O)=O	Plasminogen (P00747; Homo sapiens); Apolipoprotein(a) (P08519; Homo sapiens)	0.390625	0.390625	Coagulant/Antifibrinolytic Agents	antagonist		Tissue-type plasminogen activator (P00750; Homo sapiens)	ND	131.173
34	Iloprost	DB01088	Approved, Investigational	N/A	[H][C@]12C[C@@H](O)[C@H](\C=C\[C@@H](O)C(C)CC#CC)[C@@]1([H])C\C(C2)=C\CCCC(O)=O	7 other human targets (https://www.drugbank.ca/drugs/DB101088)	0.317932	0.302376	Anticoagulant/Hypotensive Agents	N/A				360.494
35	5-(DIMETHYLAMINO)-2-NAPHTHALENESULFONIC ACID	DB07684	Experimental	DSY (1BDA)	CN(C)C1=C2C=CC(=CC2=CC=C1)S(O)(=O)=O	N/A	0.300777	0.29386	N/A	N/A				251.302
36	Human C1-esterase inhibitor	DB06404	Approved	N/A	N/A	6 other human targets (https://www.drugbank.ca/drugs/DB06404)	N/A	N/A	Drugs Used in Hereditary Angioedema/Protease Inhibitors	inhibitor				N/A
37	Conestat alfa	DB09228	Approved, Investigational	N/A	N/A	6 other human targets (https://www.drugbank.ca/drugs/DB09228)	N/A	N/A	Drugs Used in Hereditary Angioedema/Protease Inhibitors	inhibitor				67000
38	Dexibuprofen	DB09213	Approved, Investigational	IBP (12 PDB entries; https://www.ebi.ac.uk/pdbe-srv/pdbechem/PDBEntry/list/IBP)	CC(C)CC1=CC=C(C=C1)[C@H](C)C(O)=O	11 other human targets (https://www.drugbank.ca/drugs/DB09213)	0.369261	0.373757	Non COX-2 selective NSAIDS/Antirheumatic	modulator				206.281
39	Ribavirin	DB00811	Approved	RBV (3SFU; 4PB1; 5AXD)	NC(=O)C1=NN(C=N1)[C@@H]1O[C@H](CO)[C@@H](O)[C@H]1O	4 other human targets and 3 other viral targets (https://www.drugbank.ca/drugs/DB00811)	0.370968	0.342983	Antiviral Agents/Antimetabolites	N/A		Genome polyprotein (P12823; Dengue virus type 2 (strain Puerto Rico/PR159-S1/1969) (DENV-2))	ND	244.205
40	S-adenosyl-L-homocysteine	DB01752	Experimental	SAH (955 PDB entries; https://www.ebi.ac.uk/pdbe-srv/pdbechem/PDBEntry/list/SAH)	N[C@@H](CCSC[C@H]1O[C@H]([C@H](O)[C@@H]1O)N1C=NC2=C(N)N=CN=C12)C(O)=O	35 other targets including some human targets (https://www.drugbank.ca/drugs/DB01752)	0.455758	0.416569	Ribonucleosides	N/A	N/I			384.411
41	N-BENZYLOXYCARBONYL-L-SERINE-BETALACTONE	DB04634	Experimental	BBL (6 PDB entries; https://www.ebi.ac.uk/pdbe-srv/pdbechem/PDBEntry/list/BBL)	[H][C@@](C)(NC(=O)OCC1=CC=CC=C1)C(O)=O	Genome polyprotein (P06441; HHAV); Genome polyprotein (P13901; HHAV)	0.412	0.402367	N/A	N/A	No known approved molecules of our interest.	Genome polyprotein (P08617; Human hepatitis A virus genotype IB (isolate HM175) (HHAV) (Human hepatitis A virus (isolate Human/Australia/HM175/1976)))	ND	223.225
42	Phenylalanylamide	DB04029	Experimental	NFA (17 PDB entries; https://www.ebi.ac.uk/pdbe-srv/pdbechem/PDBEntry/list/NFA)	N[C@@H](CC1=CC=CC=C1)C(N)=O	Genome polyprotein (P13901; HHAV); D-Amino acid amidase (Q9LCC8; Ochrobactrum anthropi)	0.336	0.340637	Peptide	N/A				164.204
43	{1-[2-(1-FORMYL-PROPYL)-3-METHANESULFONYLAMINO-PYRROLIDINE-1-CARBONYL]-2-METHYL-PROPYL}-CARBAMIC ACID TERT-BUTYL ESTER	DB08644	Experimental	TRL (1N1L)	[H][C@@](CC)(C=O)[C@@]1([H])N(CC[C@]1([H])NS(C)(=O)=O)C(=O)[C@@]([H])(NC(=O)OC(C)(C)C)C(C)C	N/A	0.39145	0.368215	N/A	N/A	No known approved molecules of our interest.	Genome polyprotein (P27958; Hepatitis C virus genotype 1a (isolate H) (HCV))	ND	433.563
44	Uridine 5'-triphosphate	DB04005	Experimental, Investigational	UTP (17 PDB entries; https://www.ebi.ac.uk/pdbe-srv/pdbechem/PDBEntry/list/UTP)	O[C@H]1[C@@H](O)[C@@H](O[C@@H]1COP(O)(=O)OP(O)(=O)OP(O)(O)=O)N1C=CC(=O)NC1=O	Uridine-cytidine kinase 2 (Q9BZX2; Homo sapiens); Genome polyprotein ( P26662; HCV)	0.423906	0.390054	Ribonucleotides	N/A	DB04005: N/I 27 molecules are listed in DB against P26663; Only Approved and/ or Investigational molecules have been mentioned here. Asunaprevir, a known viral protease inhibitor and is generaly well tolerated. However, its commercialization has been cancelled in Oct. 2017	Genome polyprotein (P26663; Hepatitis C virus genotype 1b (isolate BK) (HCV))	ND	484.141
45	Nesbuvir	DB07238	Investigational	79Z (3FQK;3FQL;4TLR)	CNC(=O)C1=C(OC2=CC(N(CCO)S(C)(=O)=O)=C(C=C12)C1CC1)C1=CC=C(F)C=C1	Genome polyprotein (Q9WMX2; Hepatitis C virus genotype 1b (isolate Con1) (HCV))	0.471413	0.50171	Amide/ HCV infection treatment	N/A				446.492
46	Asunaprevir	DB11586	Approved, Investigational, Withdrawn	2R9 (4NWL; 4WF8; 4WH6; 5EQS)	COC1=CN=C(O[C@@H]2C[C@H](N(C2)C(=O)[C@@H](NC(=O)OC(C)(C)C)C(C)(C)C)C(=O)N[C@@]2(C[C@H]2C=C)C(=O)NS(=O)(=O)C2CC2)C2=C1C=CC(Cl)=C2	N/A	0.510808	0.495511	HCV NS3 protease inhibitor/HIV Protease Inhibitors	inhibitor				748.286
47	(2z)-2-(Benzoylamino)-3-[4-(2-Bromophenoxy)Phenyl]-2-Propenoic Acid	DB01720	Experimental	PH7 (1YVF)	OC(=O)C(\NC(=O)C1=CC=CC=C1)=C\C1=CC=C(OC2=CC=CC=C2Br)C=C1	N/A	0.467949	0.473348	N/A	N/A	No approved molecule of our interest	Genome polyprotein (P26662; Hepatitis C virus genotype 1b (isolate Japanese) (HCV))	ND	438.271
48	Uridine 5'-triphosphate	DB04005	Experimental, Investigational	UTP ((17 PDB entries; https://www.ebi.ac.uk/pdbe-srv/pdbechem/PDBEntry/list/UTP)	O[C@H]1[C@@H](O)[C@@H](O[C@@H]1COP(O)(=O)OP(O)(=O)OP(O)(O)=O)N1C=CC(=O)NC1=O	Uridine-cytidine kinase 2 (Q9BZX2; Homo sapiens); Genome polyprotein ( P26662; HCV)	0.423906	0.390054	Ribonucleotides	N/A	N/I			484.141
49	Ciluprevir	DB05868	Investigational	N/A	COC1=CC2=C(C=C1)C(O[C@H]1CN3C(=O)[C@H](CCCCC\C=C/[C@]4([H])C[C@@]4(C(O)=O)NC(=O)[C@]3([H])C1)NC(=O)OC1CCCC1)=CC(=N2)C1=CSC(NC(C)C)=N1	N/A	0.506918	0.516093	HCV NS3 protease inhibitor	N/A	No known approved molecules of our interest. XTL-6865 is a combination of two fully human monoclonal antibodies (Ab68 and Ab65) against the hepatitis C virus E2 envelope protein. It is being developed to prevent HCV re-infection following a liver transplant and for the treatment of chronic HCV disease.	Genome polyprotein (P26664; Hepatitis C virus genotype 1a (isolate 1) (HCV))	ND	774.925
50	XTL-6865	DB06058	Investigational	N/A	N/A	N/A	N/A	N/A	Human monoclonal antibodies (Ab68 and Ab65)/ Anti HCV	N/A				N/A
51	Danoprevir	DB11779	Investigational	N/A	CC(C)(C)OC(=O)N[C@H]1CCCCC\C=C/[C@@H]2C[C@]2(NC(=O)[C@@H]2C[C@H](CN2C1=O)OC(=O)N1CC2=CC=CC(F)=C2C1)C(=O)NS(=O)(=O)C1CC1	N/A	0.519744	0.486135	NS3/4A protease inhibitor/Cytochrome P-450 Enzyme Inhibitors	N/A				731.84
52	N-[(2R,3S)-1-((2S)-2-{[(CYCLOPENTYLAMINO)CARBONYL]AMINO}-3-METHYLBUTANOYL)-2-(1-FORMYL-1-CYCLOBUTYL)PYRROLIDINYL]CYCLOPROPANECARBOXAMIDE	DB07582	Experimental	CPX (1RTL)	[H][C@](NC(=O)NC1CCCC1)(C(C)C)C(=O)N1CC[C@]([H])(NC(=O)C2CC2)[C@@]1([H])C1(CCC1)C=O	NS3 protease (Q91RS4; HCV)	0.365035	0.327691	N/A	N/A				446.583
53	N-[(2R,3S)-1-((2S)-2-{[(CYCLOPENTYLAMINO)CARBONYL]AMINO}-3-METHYLBUTANOYL)-2-(1-FORMYL-1-CYCLOBUTYL)PYRROLIDINYL]CYCLOPROPANECARBOXAMIDE	DB07582	Experimental	CPX (1RTL)	[H][C@](NC(=O)NC1CCCC1)(C(C)C)C(=O)N1CC[C@]([H])(NC(=O)C2CC2)[C@@]1([H])C1(CCC1)C=O	Genome polyprotein (P26664; HCV)	0.365035	0.327691	N/A	N/A	All these molecules are known for their inhibitory activity against HCV protease.	NS3 protease (Q91RS4; Hepacivirus C)	ND	446.583
54	Simeprevir	DB06290	Approved	30B (3KEE)	[H][C@]12C[C@]1(NC(=O)[C@]1([H])C[C@H](C[C@@]1([H])C(=O)N(C)CCCC\C=C/2)OC1=CC(=NC2=C1C=CC(OC)=C2C)C1=NC(=CS1)C(C)C)C(=O)NS(=O)(=O)C1CC1	N/A	0.531388	0.526258	Antiviral Agents/Protease Inhibitors	inhibitor				749.939
55	Glecaprevir	DB13879	Approved, Investigational	N/A	[H][C@@]12CN(C(=O)[C@@]([H])(NC(=O)O[C@]3([H])CCC[C@@]3([H])OC\C=C\C(F)(F)C3=NC4=C(C=CC=C4)N=C3O1)C(C)(C)C)[C@@]([H])(C2)C(=O)N[C@@]1(C[C@H]1C(F)F)C(=O)NS(=O)(=O)C1(C)CC1	N/A	0.538378	0.540745	Antiviral Agents/NS3/4A Protease Inhibitors	inhibitor				838.87
56	Nesbuvir	DB07238	Investigational	79Z (3FQK;3FQL;4TLR)	CNC(=O)C1=C(OC2=CC(N(CCO)S(C)(=O)=O)=C(C=C12)C1CC1)C1=CC=C(F)C=C1	Genome polyprotein (Q9WMX2; Hepatitis C virus genotype 1b (isolate Con1) (HCV))	0.471413	0.50171	Amide	N/A	Under clinical trial	Genome polyprotein (Q9WMX2; Hepatitis C virus genotype 1b (isolate Con1) (HCV))	ND	446.492
57	(3R)-3-[3,5-Bis(trifluoromethyl)anilino]-2-cyano-3-sulfanylpropanamide	DB06913	Experimental	221 (2IJN)	[H]S[C@@H](N([H])C1=CC(=CC(=C1)C(F)(F)F)C(F)(F)F)C(C#N)C(=O)N([H])[H]	N/A	0.406557	0.393972	N/A	N/A	No known approved molecules	Genome polyprotein (Q99AU2; Hepatitis C virus subtype 1b)	ND	357.275
58	2-{[N-(2-ACETYL-5-CHLORO-4-FLUOROPHENYL)GLYCYL]AMINO}BENZOIC ACID	DB07085	Experimental	452 (2QE2)	CC(=O)C1=CC(F)=C(Cl)C=C1NCC(=O)NC1=CC=CC=C1C(O)=O	N/A	0.292617	0.326251	N/A	N/A				364.755
59	2-{[(4-CHLOROPHENOXY)ACETYL]AMINO}BENZOIC ACID	DB07185	Experimental	617 (2QE5)	OC(=O)C1=C(NC(=O)COC2=CC=C(Cl)C=C2)C=CC=C1	N/A	0.414163	0.431965	N/A	N/A				305.713
60	1-[(2-AMINO-4-CHLORO-5-METHYLPHENYL)SULFONYL]-L-PROLINE	DB07273	Experimental	885 (2GC8)	[H][C@]1(CCCN1S(=O)(=O)C1=C(N)C=C(Cl)C(C)=C1)C(O)=O	N/A	0.351282	0.365806	N/A	N/A				318.777
61	3-(1,1-dioxido-4H-1,2,4-benzothiadiazin-3-yl)-4-hydroxy-1-(3-methylbutyl)quinolin-2(1H)-one	DB07275	Experimental	888 (2FVC)	CC(C)CCN1C(=O)C(C2=NS(=O)(=O)C3=CC=CC=C3N2)=C(O)C2=CC=CC=C12	N/A	0.512237	0.507066	Antiviral Agent	N/A				411.474
62	5-(4-CYANOPHENYL)-3-{[(2-METHYLPHENYL)SULFONYL]AMINO}THIOPHENE-2-CARBOXYLIC ACID	DB07547	Experimental	CCT (2D3U)	CC1=CC=CC=C1S(=O)(=O)NC1=C(SC(=C1)C1=CC=C(C=C1)C#N)C(O)=O	N/A	0.38357	0.378909	N/A	N/A				398.455
63	5-(4-FLUOROPHENYL)-3-{[(4-METHYLPHENYL)SULFONYL]AMINO}THIOPHENE-2-CARBOXYLIC ACID	DB07770	Experimental	FIH (2D3Z)	CC1=CC=C(C=C1)S(=O)(=O)NC1=C(SC(=C1)C1=CC=C(F)C=C1)C(O)=O	N/A	0.374452	0.365551	N/A	N/A				391.436
64	5'-ACETYL-4-{[(2,4-DIMETHYLPHENYL)SULFONYL]AMINO}-2,2'-BITHIOPHENE-5-CARBOXYLIC ACID	DB08556	Experimental	SNH (2D41)	CC(=O)C1=CC=C(S1)C1=CC(NS(=O)(=O)C2=CC=C(C)C=C2C)=C(S1)C(O)=O	N/A	0.4061	0.415717	N/A	N/A				435.537
65	Mdl 101,146	DB02341	Experimental	SEI (1b0e, 1b0f)	CC(C)[C@@H](NC(=O)C1=CC=C(C=C1)C(=O)N1CCOCC1)C(=O)N1CCC[C@@H]1C(=O)N[C@H](C(C)C)C(=O)C(F)(F)C(F)(F)F	Chymotrypsin-like elastase family member 1 (Q9UNI1; Homo sapiens)	0.43	0.41	Pancreattic Elastase, antagonists & inhibitors	N/A		Neutrophil elastase (P08246; Homo sapiens)	ND	632.619
66	Freselestat	DB03925	Experimental, Investigational	681	CC(C)[C@@H](NC(=O)CN1C(=O)C(N)=CN=C1C1=CC=CC=C1)[C@@H](O)C1=NN=C(O1)C(C)(C)C	Chymotrypsin-like elastase family member 1 (Q9UNI1; Homo sapiens)	0.49	0.43	Leukocyte Elastase, antagonists & inhibitors (COPD treatment)	inhibitor				454.522
67	Elafin	DB05161	Investigationanl	N/A	N/A	Myeloblastin (P24158; Homo sapiens)	N/A	N/A	Proteinase Inhibitory Proteins, Secretory	N/A	Elafin’s ability to block the activity of destructive enzymes that are involved in inflammatory reactions makes it a highly promising active compound for the treatment of inflammatory lung diseases or severe reperfusion injuries occurring after heart attacks, serious injuries and organ transplantation. The excellent tolerability of Elafin in human subjects was demonstrated in a Phase I clinical s…			N/A
68	Tranexamic acid	DB00302	Approved	AMH (1B2I, 1CEB, 5V3C, 6NMB)	NC[C@H]1CC[C@@H](CC1)C(O)=O	N/A	0.46	0.46	Antifibrinolytic Agents	inhibitor	Reports are available of abnormal coagulation observed in novel coronavirus patients (https://onlinelibrary.wiley.com/doi/full/10.1111/jth.14768). These anticoagulant might be helpful. Further understanding is required.	Plasminogen (P00747; Homo sapiens)	ND	157.21
69	Aminocaproic acid	DB00513	Approved, Investigational	ACA (50 PDB Entries; https://www.ebi.ac.uk/pdbe-srv/pdbechem/PDBEntry/list/ACA)	NCCCCCC(O)=O	Tissue-type plasminogen activator (P00750; Homo sapiens); Apolipoprotein(a) (P08519; Homo sapiens)	0.39	0.39	Antifibrinolytic Agents	inhibitor				131.173
70	Apixaban	DB06605	Approved	GG2 (2P16)	COC1=CC=C(C=C1)N1N=C(C(N)=O)C2=C1C(=O)N(CC2)C1=CC=C(C=C1)N1CCCCC1=O	N/A	0.48	0.53	Anticoagulants/Serine Protease Inhibitors	inhibitor	Total 65 molecules are listed in DrugBank against P00742. Only three approved molecules have been mentioned in this sheet.	Coagulation factor X (P00742; Homoapiens)	ND	459.497
71	Edoxaban	DB09075	Approved	N/A	CN(C)C(=O)[C@H]1CC[C@H](NC(=O)C(=O)NC2=NC=C(Cl)C=C2)[C@@H](C1)NC(=O)C1=NC2=C(CN(C)CC2)S1	N/A	0.48	0.49	Anticoagulants/Serine Protease Inhibitors	inhibitor				548.06
72	Betrixaban	DB12364	Approved, Investigational	N/A	COC1=CC=C(NC(=O)C2=CC=C(C=C2)C(=N)N(C)C)C(=C1)C(=O)NC1=CC=C(Cl)C=N1	N/A	0.350032	0.402658	Anticoagulant /Protease Inhibitors	inhibitor				451.91
73	Amiloride	DB00594	Approved	AMR (1F5L; 4NTX)	NC(=N)NC(=O)C1=NC(Cl)=C(N)N=C1N	8 other human targets (https://www.drugbank.ca/drugs/DB00594)	0.27	0.3	Hypotensive Agents/Diuretics/Sodium Channel Blockers	inhibitor	Total 33 molecules are listed in DrugBank against P00749. Only one approved molecule has been mentioned in this sheet.	Urokinase-type plasminogen activator (P00749; Homo sapiens)	ND	229.627
74	[2'-HYDROXY-3'-(1H-PYRROLO[3,2-C]PYRIDIN-2-YL)-BIPHENYL-3-YLMETHYL]-UREA	DB07247	Experimental	7NH (2FLR)	NC(=O)NCC1=CC(=CC=C1)C1=C(O)C(=CC=C1)C1=CC2=C(N1)C=CN=C2	Tissue factor (P13726; Homo sapiens)	0.32	0.32	N/A	N/A	18 molecules are listed against P08709. The approved moleucles are biotech products and Vitamins: Not of our interest for this study. One experimental small molecule has been mentioned here.	Coagulation factor VII (P08709; Homo sapiens)	ND	358.393
76	2-Aminobenzyl alcohol	DB03058	Experimental	SOA (1BIO, 5SXB)	NC1=CC=CC=C1CO	N/A	0.42	0.41	N/A	N/A	No known approved molecules	Complement factor D (P00746; Homo sapiens)	ND	123.153
77	3,4-Dichloroisocoumarin	DB04459	Experimental	DIC (1DIC)	ClC1=C(Cl)C2=CC=CC=C2C(=O)O1	N/A	0.36	0.37	N/A	N.A				215.033
82	Elafin	DB05161	Investigationanl	N/A	N/A	Neutrophil elastase (P08246; Homo sapiens)	N/A	N/A	Proteinase Inhibitory Proteins, Secretory	N/A	Elafin’s ability to block the activity of destructive enzymes that are involved in inflammatory reactions makes it a highly promising active compound for the treatment of inflammatory lung diseases or severe reperfusion injuries occurring after heart attacks, serious injuries and organ transplantation. The excellent tolerability of Elafin in human subjects was demonstrated in a Phase I clinical s…	Myeloblastin (P24158; Homo sapiens)	ND	N/A
83	Nafamostat	DB12598	Investigational / Approved in some Asian countries	N/A	NC(=N)NC1=CC=C(C=C1)C(=O)OC1=CC2=C(C=C1)C=C(C=C2)C(N)=N	5 other human targets (https://www.drugbank.ca/drugs/DB12598)	0.416122	0.421739	Anticoagulant/Antirheumatic Agents/Protease Inhibitors	inhibitor	101 molecules are listed in DrugBak against P07477. Only three of them are mentioned here.	Trypsin-1 (P07477; Homo sapiens)	ND	347.378
84	Camostat	DB13729	Experimental/ Approved in Japan	N/A	CN(C)C(=O)COC(=O)CC1=CC=C(OC(=O)C2=CC=C(NC(N)=N)C=C2)C=C1	N/A	0.46	0.47	Antifibrinolytic Agents/Serine Protease Inhibitors	inhibitor				398.413
85	ZK-806711	DB03373	Experimental	711 [1QBO]	[H]N=C(C)N1CCC(CC1)OC1=CC2=C(C=C1)N=C(C)N2CC1=CC2=C(C=C1)C=CC(=C2)C(N)=[NH2+]	N/A	0.4	0.37	N/A	N/A				455.575
86	Benzamidine	DB03127	Experimental	BAM (30 PDB entries; https://www.ebi.ac.uk/pdbe-srv/pdbechem/PDBEntry/list/BAM)	NC(=[NH2+])C1=CC=CC=C1	10 other targets including some human proteins (https://www.drugbank.ca/drugs/DB03127)	0.360784	0.359375	Enzyme Inhibitors	N/A	No known approved molecules. Only 1 experimental molecule is listed.	Kallikrein-6 (Q92876; Homosapiens)	ND	121.16
87	4-(1,3,2-Dioxaborolan-2-Yloxy)Butan-1-Aminium	DB02308	Experimental	DYB (1S84)	[NH3+]CCCCOB1OCCO1	N/A	0.31	0.31	N/A	N/A	No known approved molecules. 8 experimental molecules are listed against P35030.	Trypsin-3 (P35030; Homo sapiens)	ND	159.999
88	Bentiromide	DB00522	Investigational, Withdrawn	N/A	OC(=O)C1=CC=C(NC(=O)[C@H](CC2=CC=C(O)C=C2)NC(=O)C2=CC=CC=C2)C=C1	N/A	0.3	0.36	Diagonistic agent (used in the bentiromide test, which is a screening test for evaluating pancreatic exocrine function and monitoring the adequacy of supplemental pancreatic therapy)	N/A	5 molecules are listed which are mostly biotech products.	Serine protease hepsin (P05981; Homo sapiens)	ND	404.415
91	beta-Hydroxyasparagine	DB04527	Experimental	AHB (1DSR; 1NT0; 2OG7;2QC9;2ZGD)	N[C@@H]([C@H](O)C(N)=O)C(O)=O	N/A	0.32	0.31	Amino Acids	N/A	No known approved molecule.	Mannan-binding lectin serine protease 2 (O00187; Homo sapiens)	ND	148.117
92	TTP889	DB05131	Investigational	N/A	N/A	N/A	N/A	N/A	Anticoagulant	N/A	12 molecules are listed. All approved moleules are mostly biotech products. TTP889 is the only known selective small molecule inhibitor of Factor IX, a key enzyme of the intrinsic pathway of the blood coagulation system. TTP889 has proven to be effective in preventing clot formation in several animal models of human disease, without any signs of the bleeding associated with traditional anticoagul…	Coagulation factor IX (P00740; Homo sapiens)	ND	N/A
93	Foretinib	DB12307	Investigational	88Z (3LQ8; 5IA3; 6I2Y; 6SD9; 6SDC)	COC1=C(OCCCN2CCOCC2)C=C2N=CC=C(OC3=CC=C(NC(=O)C4(CC4)C(=O)NC4=CC=C(F)C=C4)C=C3F)C2=C1	Vascular endothelial growth factor receptor 2 (P35968; Vascular endothelial growth factor receptor 2)	0.39	0.41	Anti-cancer/Tyrosine kinase inhibitor	N/A	5 molecules listed against P14210; The approved mol is biotech product.	Hepatocyte growth factor (P14210; Homo sapiens)	ND	632.654
94	ABT-510	DB05434	Investigational	N/A	CCC[C@H](NC(=O)[C@@H](NC(=O)[C@H](NC(=O)[C@@H](NC(=O)CNC(=O)CN(C)C(C)=O)C(C)C)[C@@H](C)CC)[C@@H](C)O)C(=O)N[C@@H]([C@@H](C)CC)C(=O)N[C@@H](CCCN=C(N)N)C(=O)N1CCC[C@H]1C(=O)NCC	Fibroblast growth factor 2 (P09038; Homo sapiens); Vascular endothelial growth factor A (P15692; Homo sapiens); Interleukin-8 (P10145; Homo sapiens)	0.51	0.49	Anti-cancer/peptidomimetic	N/A				994.232
103	Nafamostat	DB12598	Investigational / Approved in Asian countries	N/A	NC(=N)NC1=CC=C(C=C1)C(=O)OC1=CC2=C(C=C1)C=C(C=C2)C(N)=N	5 other human targets (https://www.drugbank.ca/drugs/DB12598)	0.416122	0.421739	Anticoagulant/Antirheumatic Agents/Protease Inhibitors	inhibitor	8 molecules are listed against P06870. Most of the others are not of our interest for this study.	Kallikrein-1 (P06870; Homo sapiens)	ND	347.378
104	(1R)-2-[(Diaminomethylene)amino]-1-{4-[(4R)-4-(hydroxymethyl)-1,3,2-dioxaborolan-2-yl]phenyl}ethyl nicotinate	DB07023	Experimental	368 (1ZLR)	[H]N([H])C(=NC[C@H](OC(=O)C1=CN=CC=C1)C1=CC=C(C=C1)B1OC[C@@H](CO)O1)N([H])[H]	N/A	0.32	0.33	N/A	N/A	17 molecules are listed against P03951. The approved molecules are biotech product and are not of our interest. A no. of experimental molecules are listed; two of those are mentioned here.	Coagulation factor XI (P03951; Homo sapiens)	ND	384.194
105	(R)-1-(4-(4-(hydroxymethyl)-1,3,2-dioxaborolan-2-yl)benzyl)guanidine	DB07887	Experimental	HDB (1ZMJ)	[H]N([H])C(=NCC1=CC=C(C=C1)B1OC[C@@H](CO)O1)N([H])[H]	N/A	0.32	0.33	N/A	N/A				249.074
106	Gabexate	DB12831	Investigational	N/A	CCOC(=O)C1=CC=C(OC(=O)CCCCCNC(N)=N)C=C1	Plasma kallikrein (Homo sapiens); Plasminogen (Homo sapiens)	0.347299	0.342795	Anticoagulant/Protease Inhibitors	inhibitor	9 molecules are listed against P02679. All are biotech products except Gabexte	Plasma kallikrein (P03952; Homo sapiens)	ND	321.377
107	L-alanyl-N-[(1S,2R)-1-benzyl-2-hydroxypropyl]-L-alaninamide	DB08038	Experimental	K7I (2QXG)	[H][C@@](C)(N)C(=O)N[C@@]([H])(C)C(=O)N[C@@]([H])(CC1=CC=CC=C1)[C@@]([H])(C)O	N/A	0.43	0.42			No known approved molecules	Kallikrein-7 (P49862; Homo sapiens)	ND	307.388
108	Cyproterone acetate	DB04839	Approved, Investigational	CA4 (2OZ7)	[H][C@@]12C[C@]1([H])[C@@]1(C)C(=CC2=O)C(Cl)=C[C@@]2([H])[C@]3([H])CC[C@](OC(C)=O)(C(C)=O)[C@@]3(C)CC[C@]12[H]	Androgen receptor (P10275; Hmo sapiens)	0.34	0.32	Antineoplastic Agents/Reproductive Control Agents	N/A	This drug inhibits no. of Cytochrome P-450 enzymes and the primary target of this drug is human protein. So it is less likely to be a good choice.	Prostate-specific antigen (P07288; Homo sapiens)	ND	307.388
109	Mifepristone	DB00834	Approved, Investigational	486 (7 PDB entries; https://www.ebi.ac.uk/pdbe-srv/pdbechem/PDBEntry/list/486)	[H][C@@]12CC[C@@](O)(C#CC)[C@@]1(C)C[C@H](C1=CC=C(C=C1)N(C)C)C1=C3CCC(=O)C=C3CC[C@@]21[H]	3 other human targets (https://www.drugbank.ca/drugs/DB00834)	0.38	0.38	Abortifacient Agents/Reproductive Control Agents	N/A	This drug inhibits and/induces no. of Cytochrome P-450 enzymes and the primary target of this drug is human protein. So would not be a good choice.			429.594
111	1-[4-(hydroxymethyl)phenyl]guanidine	DB06900	Experimental	1JZ (3FVF)	NC(=N)NC1=CC=C(CO)C=C1	N/A	0.32	0.33	N/A	N/A	No known approved molecules	Prostasin (Q16651; Homo sapiens)	ND	165.192
112	Menadione	DB00170	Approved, Nutraceutical	VK3 (1TUV; 2QR2; 4F8Y; 6RVH)	CC1=CC(=O)C2=CC=CC=C2C1=O	12 other human targets (https://www.drugbank.ca/drugs/DB00170)	0.37	0.38	Antifibrinolytic Agents/Vitamin K	activator	Not of our interest	Vitamin K-dependent protein Z (P22891; Homo sapiens)	ND	172.18
114	Benzylsulfonic acid	DB03297	Experimental	PMS (31 PDB entries; https://www.ebi.ac.uk/pdbe-srv/pdbechem/chemicalCompound/show/PMS)	OS(=O)(=O)CC1=CC=CC=C1	6 other targets (including some human and few microbial targets)	0.46	0.46	N/A	N/A	No known approved molecules	Chymase (P23946; Homo sapiens)	ND	172.202
115	2-(N-morpholino)ethanesulfonic acid	DB03814	Experimental	MES (1511 PDB Etries; https://www.ebi.ac.uk/pdbe-srv/pdbechem/PDBEntry/list/MES)	OS(=O)(=O)CCN1CCOCC1	48 other targets (including some human and few microbial targets)	0.46	0.46	N/A	N/A				195.237
116	2-[3-({Methyl[1-(2-Naphthoyl)Piperidin-4-Yl]Amino}Carbonyl)-2-Naphthyl]-1-(1-Naphthyl)-2-Oxoethylphosphonic Acid	DB04016	Experimental	OHH (1T31 / 1T32)	CN(C1CCN(CC1)C(=O)C1=CC2=CC=CC=C2C=C1)C(=O)C1=CC2=CC=CC=C2C=C1C(=O)[C@@H](C1=CC=CC2=CC=CC=C12)P(O)(O)=O	Cathepsin G (P08311; Homo sapiens)	0.42	0.4	N/A	N/A				670.689
117	[(1S)-1-(5-CHLORO-1-BENZOTHIEN-3-YL)-2-(2-NAPHTHYLAMINO)-2-OXOETHYL]PHOSPHONIC ACID	DB07680	Experimental	DRX (2HVX)	[H][C@@](C(=O)NC1=CC=C2C=CC=CC2=C1)(C1=CSC2=C1C=C(Cl)C=C2)P(O)(O)=O	N/A	0.39	0.4	N/A	N/A				431.829
123	Ethanolamine oleate	DB06689	Approved	N/A	NCCO.CCCCCCCC\C=C/CCCCCCCC(O)=O	N/A	0.49	0.49	Antivaricose Therapy	activator	It chelates Calcium ions.	Coagulation factor XII (P00748; Homo sapiens)	ND	343.544
124	Nafamostat	DB12598	Investigational / Approved in Asian countries	N/A	NC(=N)NC1=CC=C(C=C1)C(=O)OC1=CC2=C(C=C1)C=C(C=C2)C(N)=N	5 other human targets (https://www.drugbank.ca/drugs/DB12598)	0.416122	0.421739	Anticoagulant/Antirheumatic Agents/Protease Inhibitors	inhibitor				347.378
125	Benzamidine	DB03127	Experimental	BAM (30 PDB entries; https://www.ebi.ac.uk/pdbe-srv/pdbechem/PDBEntry/list/BAM)	NC(=[NH2+])C1=CC=CC=C1	10 other targets including some human proteins (https://www.drugbank.ca/drugs/DB03127)	0.360784	0.359375	Enzyme Inhibitors	N/A	N/I No known approved molecule of our interest.	Trypsin (P00775; Streptomyces griseus)	ND	121.16
126	1,4-Dioxane	DB03316	Experimental	DIO (176 PDB entries; https://www.ebi.ac.uk/pdbe-srv/pdbechem/PDBEntry/list/DIO)	C1COCCO1	4 other targets including some human proteins (https://www.drugbank.ca/drugs/DB03316)	0.296875	0.296875	N/A	N/A	N/I No known approved molecule of our interest.	Structural polyprotein (P03316; Sindbis virus)	ND	88.1051
127	1-(1'-{[3-(methylsulfanyl)-2-benzothiophen-1-yl]carbonyl}spiro[1-benzofuran-3,4'-piperidin]-5-yl)methanamine	DB06848	Experimental	11M (2zeb)	CSC1=C2C=CC=CC2=C(S1)C(=O)N1CCC2(COC3=C2C=C(CN)C=C3)CC1	N/A	0.45	0.46	N/A	N/A	No known approved molecule of our interest.	Tryptase alpha/beta-1 (Q15661; Homo sapiens)	ND	424.579
128	1-[1'-(3-phenylacryloyl)spiro[1-benzofuran-3,4'-piperidin]-5-yl]methanamine	DB06849	Experimental	11N (2zec)	NCC1=CC2=C(OCC22CCN(CC2)C(=O)\C=C\C2=CC=CC=C2)C=C1	N/A	0.35	0.36	N/A	N/A				348.438
129	N-BENZYLOXYCARBONYL-L-SERINE-BETALACTONE	DB04634	Experimental	BBL (6 PDB entries; https://www.ebi.ac.uk/pdbe-srv/pdbechem/PDBEntry/list/BBL)	[H][C@@](C)(NC(=O)OCC1=CC=CC=C1)C(O)=O	Genome polyprotein (P06441; P08617; HHAV)	0.412	0.402367	N/A	N/A		Genome polyprotein (P13901; HHAV)	ND	223.225
130	Phenylalanylamide	DB04029	Experimental	NFA (17 PDB entries; https://www.ebi.ac.uk/pdbe-srv/pdbechem/PDBEntry/list/NFA)	N[C@@H](CC1=CC=CC=C1)C(N)=O	Genome polyprotein (P08617; HHAV) D-Amino acid amidase (Q9LCC8; Ochrobactrum anthropi)	0.336	0.340637	Peptide	N/A				164.204
131	Ibuprofen	DB01050	Approved	N/A	CC(C)CC1=CC=C(C=C1)C(C)C(O)=O	9 other human targets (https://www.drugbank.ca/drugs/DB01050)	0.37	0.37	Antiinflammatory and Antirheumatic Products, Non-Steroids	inducer		Thrombomodulin (P07204, Homo sapiens)	ND	206.281
132	Dexibuprofen	DB09213	Approved, Investigational	IBP (12 PDB entries; https://www.ebi.ac.uk/pdbe-srv/pdbechem/PDBEntry/list/IBP)	CC(C)CC1=CC=C(C=C1)[C@H](C)C(O)=O	11 other human targets (https://www.drugbank.ca/drugs/DB09213)	0.369261	0.373757	Non COX-2 selective NSAIDS/Antirheumatic	modulator				206.281
OTHERS
3 molecules are listed. None of them are of interest.												Complement factor I (P05156; Homo sapiens)
Hits are not of interest (mainly biotech products)												Vitamin K-dependent protein C (P04070; Homo sapiens)
5 molecules are listed. None of the listed molecules are of our interest for this study.												Complement factor B (P00751; Homo sapiens)
2 molecules listed but not of our interst for this study												Suppressor of tumorigenicity 14 protein (Q9Y5Y6; Homo sapiens)
21 molecules listed against P00736. Almost all of them are biotech products.												Complement C1r subcomponent (P00736; Homo sapiens)
17 molecules listed against P09871. Almost all of them are biotech products (antibodies or other protein-based therapies).												Complement C1s subcomponent (P09871; Homo sapiens)

## Sheet: Table_S2b
Table S2b: Docking analysis of selected molecules from workflow-I
[A] Sl. No.	[B] DrugBank_mol_Name	[C] DrugBank_ID	[D] Drug_group	[E] Known_category/description/indication	[F] Predicted Binding Affinity of best pose (Autodock Vina score in kcal/mol)	[G] Residues involved in non-covalent interactions	[H] Category of available support for anti-viral property *
1	Remdesivir	DB14761	Investigational	Antiviral agents	-8	T25, T26, L27, H41, C44, T45, S46, M49, Y54, F140, L141, N142, G143, S144, C145, H163, H164, M165, E166, V186, D187, R188, Q189	III
	Remdesivir triphosphate	N/A	Active metabolite of Remdesivir		-7.2	H41, C44, T45, S46, M49, P52, Y54, N142, G143, C145, H164, M165, E166, D187, R188, Q189
2	Dabigatran etexilate (prodrug)/ Dabigatran (active metabolite)	DB06695/ DB14726	Approved/ Investigational	Anticoagulant /Protease Inhibitors	-7.2	T25, T26, H41, C44, T45, S46, M49, N142, G143, C145, H164, M165, E166, L167, P168, D187, R188, Q189, T190, Q192	N/A
3	Argatroban	DB00278	Approved, Investigational	Anticoagulant /Protease Inhibitors	-7.4	T25, T26, H41, C44, M49, Y54, F140, L141, N142, G143, S144, C145, H163, H164, M165, E166, H172, D187, R188, Q189, T190, Q192	II
4	Betrixaban	DB12364	Approved, Investigational	Anticoagulant /Protease Inhibitors	-7	T25, T26, H41, Y54, F140, L141, N142, G143, S144, C145, M165, E166, D187, R188	N/A
5	Gabexate	DB12831	Investigational	Anticoagulant/Protease Inhibitors	-6.3	T25, H41, V42, C44, T45, S46, M49, Y54, N142, G143, C145, H164, M165, E166, D187, R188, Q189	N/A
6	Nafamostat	DB12598	Investigational / Approved in Asian countries	Anticoagulant/Antirheumatic Agents/Protease Inhibitors	-8.3	H41, F140, L141, N142, G143, S144, C145, H163, H164, M165, E166, P168, H172, R188, Q189, T190, Q192	II
7	Aminocaproic acid	DB00513	Approved, Investigational	Coagulant/Antifibrinolytic Agents	-4.1	T25, H41, V42, C44, T45, M49, P52, Y54, D187, R188, Q189	N/A
8	Iloprost	DB01088	Approved, Investigational	Anticoagulant/Hypotensive Agents	-7.4	H41, C44, M49, Y54, F140, L141, N142, G143, S144, C145, H163, H164, M165, E166, H172, D187, R188, Q189, T190, Q192	N/A
9	Dexibuprofen	DB09213	Approved, Investigational	Non COX-2 selective NSAIDS/Antirheumatic	-6	H41, C44, M49, Y54, M165, E166, P168, D187, R188, Q189, T190, Q192	N/A
10	Ribavirin	DB00811	Approved	Antiviral Agents/Antimetabolites	-6.3	H41, C44, M49, Y54, C145, H164, M165, E166, L167, P168, D187, R188, Q189, T190, Q192	III
	Ribavirin triphosphate	N/A	Active metabolite of Ribavirin		-7.8	H41, C44, M49, P52, Y54, L141, N142, G143, S144, C145, H163, H164, M165, E166, D187, R188, Q189
11	Nesbuvir	DB07238	Investigational	Amide/ HCV infection treatment	-6.8	T25, T26, L27, H41, C44, T45, S46, M49, L141, N142, G143, S144, C145, M165, E166, P168	N/A
12	Asunaprevir	DB11586	Approved, Investigational, Withdrawn	HCV NS3 protease inhibitor/HIV Protease Inhibitors	-7.3	T25, T26, L27, H41, C44, T45, S46, M49, P52, Y54, F140, L141, N142, G143, S144, C145, H163, H164, M165, E166, D187, R188, Q189	II
13	Ciluprevir	DB05868	Investigational	HCV NS3 protease inhibitor	-8	T24, T25, T26, H41, C44, M49, P52, Y54, F140, L141, N142, G143, S144, C145, E166, H172, D187, R188, Q189	I
14	Danoprevir	DB11779	Investigational	NS3/4A protease inhibitor/Cytochrome P-450 Enzyme Inhibitors	-8.8	T24, T25, T26, H41, C44, T45, 46, M49, Y54, N119, N142, G143, C145, H164, M165, E166, D187, R188, Q189, T190	III
15	Simeprevir	DB06290	Approved	Antiviral Agents/Protease Inhibitors	-9.1	T24, T25, T26, H41, C44, S46, M49, F140, L141, N142, G143, S144, C145, H164, M165, E166, P168, R188, Q189, T190, Q192	I
16	Glecaprevir	DB13879	Approved, Investigational	Antiviral Agents/NS3/4A Protease Inhibitors	-7.9	T24, T25, T26, L27, H41, M49, N142, G143, C145, H164, H165, E166, L167, P168, R188, Q189, T190, Q192	N/A
17	3-(1,1-dioxido-4H-1,2,4-benzothiadiazin-3-yl)-4-hydroxy-1-(3-methylbutyl)quinolin-2(1H)-one	DB07275	Experimental	Antiviral Agent	-8	T25, T26, L27, H41, M49, F140, L141, N142, G143, S144, C145, H163, H165, E166, H172, D187, R188, Q189	N/A
18	Freselestat	DB03925	Experimental, Investigational	Leukocyte Elastase, antagonists & inhibitors (COPD treatment)	-7.5	T25, H41, C44, M49, F140, L141, N142, G143, S144, C145, H163, H164, M165, E166, P168, D187, R188, Q189, T190, Q192	N/A
19	Tranexamic acid	DB00302	Approved	Antifibrinolytic Agents	-4.8	T25, 41, C44, M49, Y54, M165, D187, R188	II
20	Apixaban	DB06605	Approved	Anticoagulants/Serine Protease Inhibitors	-7.7	T24, T25, T26, H41, C44, M49, Y54, N142, G143, C145, H164, M165, E166, D187, R188, Q189	N/A
21	Edoxaban	DB09075	Approved	Anticoagulants/Serine Protease Inhibitors	-8	T25, T26, L27, H41, M49, F140, L141, N142, G143, S144, C145, M165, E166, L167, P168, R188, Q189, T190, A191, Q192	N/A
22	Amiloride	DB00594	Approved	Hypotensive Agents/Diuretics/Sodium Channel Blockers	-5.7	H41, C44, D48, M49, P52, Y54, M165, V186, D187, R188, Q189, T190, Q192	N/A
23	Camostat	DB13729	Experimental/ Approved in Japan	Antifibrinolytic Agents/Serine Protease Inhibitors	-6.1	T24, T25, T26, L27, H41, C44, M49, Y54, N142, G143, C145, M165, E166, L167, P168, D187, R188, Q189, Q192	II
24	Foretinib	DB12307	Investigational	Anti-cancer/Tyrosine kinase inhibitor	-7.7	T25, H41, C44, T45, S46, M49, Y54, F140, L141, N142, G143, C145, H164, M165, E166, L167, P168, D187, R188, Q189	II#
25	Ibuprofen	DB01050	Approved	Antiinflammatory and Antirheumatic Products, Non-Steroids	-6.1	H41, C44, M49, M165, E166, L167, P168, D187, R188, Q189, T190, Q192	II
P.S.: The drug names and the corresponding DrugBank ID mentioned in red font indicate that the particular drug is known tp modulate (inhibit/induce) Cytochrome P450 enzymes (Source of information: DrugBank). Therefore, there are chances of drug-drug interactions. The colour code for the 'Drug_group' column is same as that of Table S2a. DB07275 is an experimental molecule and information on Cytoch…

## Sheet: INDEX_S3
The next sheet contains Table S3. Table S3 contains detailed information on of the DrugBank molecules of our interest which are obtained as hits from workflow-II. The index for table S3 is given below
Index to Table S3
Column		Explanation
(A)	Sl. No.	Serial Number
(B)	DrugBank ID	The unique identification code provided in DrugBank (red font: modulates activity of Cytochrome Enzymes); green: molecules selcted for docking
(C)	TC1 (Ref. mol: O6K)	Tanimoto coefficient of the DrugBank molecule with respect to 'O6K'
(D)	TC2 (Ref. mol. X77)	Tanimoto coefficient of the DrugBank molecule with respect to 'X77'
(E)	Name	Name of the drug (red font: modulates activity of Cytochrome Enzymes)
(F)	Status	Regulatory status; pink: Biotech product/Nutraceutiacal (NOT of interest)
(G)	Use	Current therapeutic use
(H)	Known targets	Targets listed in DrugBank (red: indicates at least one human target is listed in DrugBank; hence detailed analysis with respect to safety issues need to be done)
(I)	Known action	Type of pharmacological modulation of the target mentioned in Column (H); wherever, the pharmacological action is mediated by active metabolite is indicated in green font; any serious side-effect if available in Drugbank is documented in red font.
(J)	Chemical class	Chemical class as per chemical taxonomy present in DrugBank
(K)	Avg. Mol. Wt.	Average Molecular Weight
(L)	Predicted Binding affinity of best docked pose (Autodock Vina score in kcal/mol)	Binding affinity predicted using AutoDock Vina
(M)	Residues involved in non-covalent interactions	List of residues interacting with the docked ligand. Residues mentioned in pink are involved in hydrogen bonding with the docked ligand; the residues mentioned in green are involved in π-π stacking . Other residues in the binding site of the docked ligand which solely offer favourable conatcts to the ligand are in black font.
(N)	SMILES	1D notation of the structure of the molecule
N/A : Not Available in DrugBank N/P: Not Performed or calculated N/I: Not interesting (such as the nutraceuticals obtained as hit, which are less likely to be good drug candidates; however, benefits upon using them as supplements can be interesting to investigate in a separate study)

[truncated: 5 more sheets: Table_S3, INDEX_S4, Table_S4, INDEX_S5, Table_S5]
